# Supplementary material for: A catalytic route to dibenzodiazepines involving Buchwald–Hartwig coupling: reaction scope and mechanistic consideration
Source: Royal Society of Chemistry journal article supplement (doi:10.1039/c5ra19599c), 2015-01-01
Supplement: c5ra19599c1.pdf [file c5ra19599c1.pdf]

## Supporting information

### A Catalytic Route to Dibenzodiazepines involving Buchwald-Hartwig Coupling: Reaction Scope and Mechanistic Consideration

Daniela Peixoto,<sup>‡</sup> Abel Locati,<sup>‡</sup> Carolina S. Marques,<sup>‡</sup> Albertino Goth,<sup>‡</sup> J.P. Prates Ramalho,<sup>§, ‡</sup>, Anthony J. Burke<sup>§, ‡ \*</sup>

<sup>§</sup> Department of Chemistry and <sup>†</sup> Centro de Química de Évora University of Évora, School of Science and Technology and Institute for Research and Advanced Training, Rua Romão Ramalho, 59, 7000 Évora, Portugal.

**Page S2: General procedure for the synthesis of the imine substrates.**

**Page S4: 5*H*-Dibenzo[*b,e*][1,4]diazepine (4aa)**

**Page S5: NMR Spectra (<sup>1</sup>H 400MHz; <sup>13</sup>C 100MHz) for the aldimines (2)**

**Page S12: NMR Spectra (<sup>1</sup>H 400MHz; <sup>13</sup>C 100MHz) for the DBDA (4) and compounds (5) and (6)**

**Page S25: Bond Dissociation Energy.**

**Page S26: N-S bond cleavage.**

**Page S26: Energetics and Cartesian coordinates.**

## General procedure for the synthesis of the imine substrates

By using a Dean-Stark apparatus to facilitate water removal,  $\text{BF}_3 \cdot \text{Et}_2\text{O}$  (6 mol %) was added (through a syringe) to a solution of the aldehyde and the protected amine (1 equiv.) in benzene. The mixture was heated to reflux until the theoretical quantity of water was collected. The solution was then cooled and the solvent was evaporated under vacuum to yield a solid, which was crystallized from AcOEt/Hexane (1:9) to give the desired imine product.

***N*-(2-bromobenzylidene)-4-methylbenzenesulfonamide<sup>1</sup> (2a):** From 2-bromobenzaldehyde (5.00g, 27mmol) and 4-methylbenzenesulfonamide, according to the general procedure the *title compound* was obtained as a white solid (7.76g, 93%). <sup>1</sup>H NMR (400 MHz,  $\text{CDCl}_3$ ):  $\delta$  2.45 (s, 3H,  $\text{CH}_3$ ), 7.36 (d,  $J=8.4\text{Hz}$ , 2H, ArH), 7.39-7.43 (m, 2H, ArH), 7.66-7.67 (m, 1H, ArH), 7.91 (d,  $J=8.4\text{Hz}$ , 2H, ArH), 8.14-8.18 (m, 1H, ArH), 9.43 (br s, 1H,  $\text{HC}=\text{N}$ ) ppm. <sup>13</sup>C NMR (100 MHz,  $\text{CDCl}_3$ ):  $\delta$  21.8 ( $\text{CH}_3$ ), 128.1 (CH), 128.4 (2xCH), 129.0 (C), 130.0 (2xCH), 130.8 (CH), 131.3 (C), 133.9 (CH), 134.8 (C), 135.8 (CH), 145.0 (C), 169.3 ( $\text{HC}=\text{N}$ ) ppm.

***N*-(2-Bromobenzylidene)methanesulfonamide (2b):** From 2-bromobenzaldehyde (5.00g, 27mmol) and methanesulfonamide, according to the general procedure the *title compound* was obtained as a white solid (5.16g, 73%). <sup>1</sup>H NMR (400 MHz,  $\text{CDCl}_3$ ):  $\delta$  3.16 (s, 3H,  $\text{CH}_3$ ), 7.44-7.49 (m, 2H, ArH), 7.67-7.71 (m, 1H, ArH), 8.19-8.21 (m, 1H, ArH), 9.47 (br s, 1H,  $\text{HC}=\text{N}$ ) ppm. <sup>13</sup>C NMR (100 MHz,  $\text{CDCl}_3$ ):  $\delta$  40.4 ( $\text{CH}_3$ ), 128.2 (CH), 129.2 (C), 130.6 (CH), 131.1 (C), 134.1 (CH), 136.1 (CH), 171.0 ( $\text{HC}=\text{N}$ ) ppm.

***N*-(2-Bromobenzylidene)-4-nitrobenzenesulfonamide<sup>2</sup> (2c):** From 2-bromobenzaldehyde (5.00g, 27mmol) and 4-nitrobenzenesulfonamide, according to the general procedure the *title compound* was obtained as a white solid (6.48g, 65%). <sup>1</sup>H NMR (400 MHz,  $\text{CDCl}_3$ ):  $\delta$  7.44-7.46 (m, 1H, ArH), 7.69-7.71 (m, 1H, ArH), 7.91-7.93 (m, 1H, ArH), 8.11-8.16 (m, 1H, ArH), 8.23 (d,  $J=8.4\text{Hz}$ , 2H, ArH), 8.40 d,  $J=8.4\text{Hz}$ , 2H, ArH), 9.56 (br s, 1H,  $\text{HC}=\text{N}$ ) ppm. <sup>13</sup>C NMR (100 MHz,  $\text{CDCl}_3$ ):  $\delta$  124.6 (2xCH), 128.1 (C), 128.3 (CH), 129.7 (2xCH), 130.9 (CH), 134.2 (CH), 135.5 (C), 136.7 (CH), 144.0 (C), 150.9 (C), 171.6 ( $\text{HC}=\text{N}$ ) ppm.

<sup>1</sup> Ma, G. N.; Zhang, T.; Shi, M.; *Org Lett*, **2009**, *11*, 875-878

<sup>2</sup> R. A. Brawn, J. S. Panek, *Org. Lett.* **2009**, *11*, 4362-4363

***N*-(2-bromo-5-fluorobenzylidene)-4-methylbenzenesulfonamide<sup>3</sup> (2d):** From 2-bromo-5-fluorobenzaldehyde (1.00g, 4.9mmol) and 4-methylbenzenesulfonamide, according to the general procedure the *title compound* was obtained as a white solid (1.42g, 81%). <sup>1</sup>H NMR (400 MHz, CDCl<sub>3</sub>): δ 2.45 (s, 3H, CH<sub>3</sub>), 7.15-7.20 (m, 1H, ArH), 7.37 (d, *J*=8.8Hz, 2H, ArH), 7.61-7.65 (m, 1H, ArH), 7.82-7.85 (m, 1H, ArH), 7.89 (d, *J*=8.8Hz, 2H, ArH), 9.36 (d, *J*=2.0Hz, 1H, HC=N) ppm. <sup>13</sup>C NMR (100 MHz, CDCl<sub>3</sub>): δ 21.8 (CH<sub>3</sub>), 117.0 (d, *J*=24.1Hz, CH), 123.0 (C), 123.1 (d, *J*=22.9Hz, CH), 128.4 (2xCH), 130.0 (2xCH), 132.9 (d, *J*=7.5Hz, C), 134.4 (C), 135.2 (d, *J*=7.4Hz, CH), 145.2 (C), 161.9 (d, *J*=248.6Hz, C-F), 168.0 (d, *J*=2.2Hz, HC=N) ppm.

***N*-(2-Bromo-5-methoxybenzylidene)-4-methylbenzenesulfonamide<sup>3</sup> (2e):** From 2-bromo-5-methoxybenzaldehyde (1.00g, 4.7mmol) and 4-methylbenzenesulfonamide, according to the general procedure the *title compound* was obtained as a white solid (1.25g, 72%). <sup>1</sup>H NMR (400 MHz, CDCl<sub>3</sub>): δ 2.44 (s, 3H, CH<sub>3</sub>), 3.87 (s, 3H, OMe), 6.87-6.90 (m, 1H, ArH), 7.15 (d, *J*=2.4Hz, 1H, ArH), 7.34 (d, *J*=8.0Hz, 2H, ArH), 7.88 (d, *J*=8.0Hz, 2H, ArH), 8.12 (d, *J*=8.8Hz, 1H, ArH) 9.33 (br s, 1H, HC=N) ppm. <sup>13</sup>C NMR (100 MHz, CDCl<sub>3</sub>): δ 21.8 (CH<sub>3</sub>), 56.1 (OMe), 114.7 (CH), 118.7 (CH), 124.1 (C), 128.3 (2xCH), 129.9 (2xCH), 130.9 (C), 132.3 (2xCH), 135.5 (C), 144.6 (C), 165.3 (C), 168.6 (HC=N) ppm.

***N*-(2-Bromo-4-methoxybenzylidene)-4-methylbenzenesulfonamide<sup>3</sup> (2f):** From 2-bromo-4-methoxybenzaldehyde (1.00g, 4.7mmol) and 4-methylbenzenesulfonamide, according to the general procedure the *title compound* was obtained as a white solid (1.28g, 75%). <sup>1</sup>H NMR (400 MHz, CDCl<sub>3</sub>): δ 2.45 (s, 3H, CH<sub>3</sub>), 3.81 (s, 3H, OMe), 7.00-7.03 (m, 1H, ArH), 7.36 (d, *J*=8.4Hz, 2H, ArH), 7.52 (d, *J*=8.8Hz, 1H, ArH), 7.62 (d, *J*=3.2Hz, 1H, ArH), 7.90 (d, *J*=8.4Hz, 2H, ArH), 9.36 (br s, 1H, HC=N) ppm. <sup>13</sup>C NMR (100 MHz, CDCl<sub>3</sub>): δ 21.8 (CH<sub>3</sub>), 56.0 (OMe), 113.5 (CH), 120.0 (C), 123.9 (CH), 128.5 (2xCH), 130.0 (2xCH), 131.8 (C), 134.6 (CH), 134.7 (C), 145.0 (C), 159.3 (C), 169.4 (HC=N) ppm.

***N*-(2-Bromo-5-hydroxy-4-methoxybenzylidene)-4-methylbenzenesulfonamide (2g):** From 2-bromo-5-hydroxy-4-methoxybenzaldehyde (1.00g, 0.0043mol) and 2-bromo-5-

<sup>3</sup> M. Fujioka, T. Morimoto, T. Tsumagari, H. Tanimoto, Y. Nishiyama, K. Kakiuchi, *J. Org. Chem.* **2012**, *77*, 2911-2923.

hydroxy-4-methoxybenzaldehyde, according to the general procedure the *title compound* was obtained as a white solid (1.38g, 83%) m.p. 166.0-166.8°C. <sup>1</sup>H NMR (400 MHz, CDCl<sub>3</sub>): δ 2.44 (s, 3H, CH<sub>3</sub>), 3.97 (s, 3H, OMe), 4.75 (br s, 1H, OH), 7.07 (br s, 1H, ArH), 7.34 (d, *J*=8.8Hz, 2H, ArH), 7.70 (br s, 1H, ArH), 7.89 (d, *J*=8.8Hz, 2H, ArH), 9.29 (br s, 1H, HC=N) ppm. <sup>13</sup>C NMR (100 MHz, CDCl<sub>3</sub>): δ 21.8 (CH<sub>3</sub>), 56.7 (OMe), 115.4 (CH), 121.0 (C), 124.6 (C), 126.6 (CH), 128.3 (2xCH), 129.9 (2xCH), 135.4 (C), 144.7 (C), 145.5 (C), 152.7 (C), 168.7 (HC=N) ppm.

***5H-Dibenzo[b,e][1,4]diazepine (4aa)*** was prepared by two other pathways:

According to Scheme 4, pathway b in the main text.

*o*-Bromobenzaldehyde (0.200g, 1.08 mmol), Pd(OAc)<sub>2</sub> (2.5mol%), SPhos (5.0 mol%), 4-methylbenzenesulfonamide (1 equiv), Cs<sub>2</sub>CO<sub>3</sub> (2 equivs) and THF were added to a reaction tube and heated at 100°C for 2h. The reaction mixture was allowed to cool and then *o*-bromoaniline (1 equiv) was added and the reaction was heated at 100°C for 18 h. The reaction mixture was cooled to room temperature. The reaction mixture was filtered through celite and the solvent removed by evaporation under reduced pressure and, after purification by silica gel column chromatography using 9:1 hexane / EtOAc as the eluent, the *title compound* was obtained as a yellow solid (0.081 g, 39%).

According to Scheme 5 in the main text.

2-(2-Bromophenylamino)benzaldehyde (0.254g, 0.92mol), Pd(OAc)<sub>2</sub> (2.5mol%), SPhos (5.0 mol%), 4-methylbenzenesulfonamide (1 equiv), Cs<sub>2</sub>CO<sub>3</sub> (2 equivs) and THF were heated in a tube 100°C for 18h. The reaction mixture was allowed to cool to room temperature and then filtered through celite and the solvent was removed by evaporation under reduced pressure and, after purification by silica gel column chromatography using 9: 1 hexane / EtOAc as the eluent, the *title compound* was obtained as a yellow solid (0.018 g, 10%).

**NMR Spectra (<sup>1</sup>H 400MHz; <sup>13</sup>C 100MHz) of the aldimine substrates (2):**

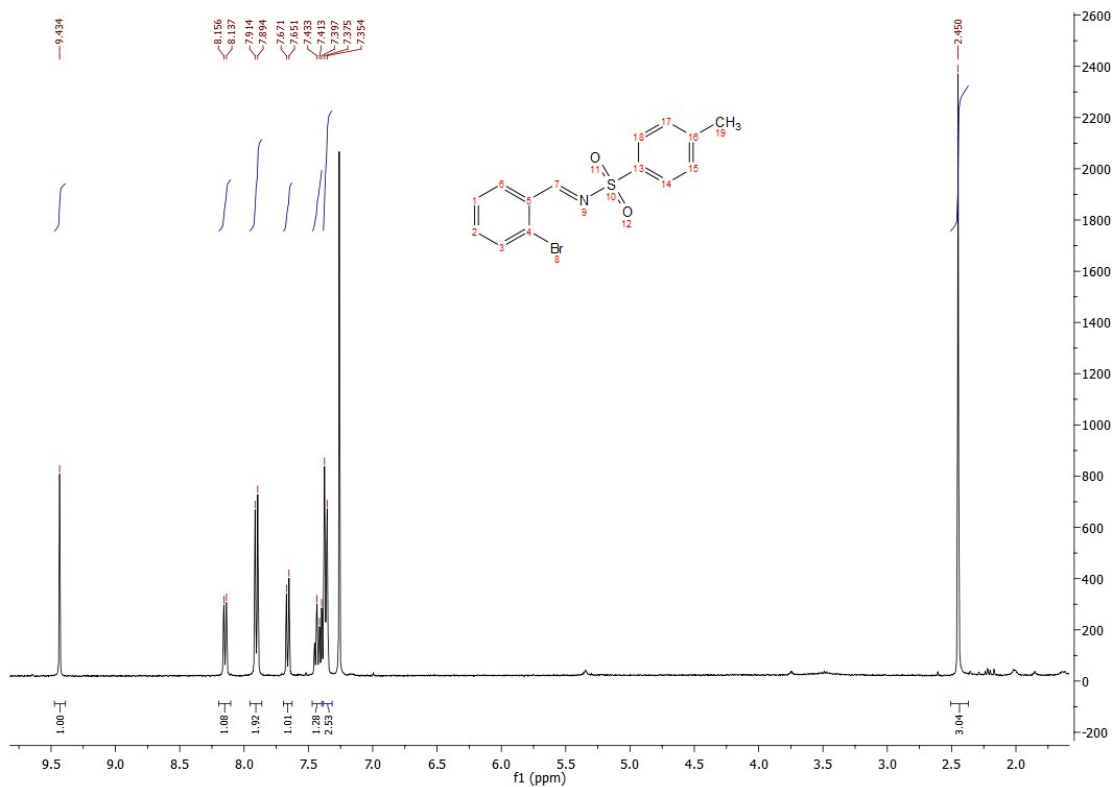

Figura S1.  $^1\text{H}$  NMR spectrum of *N*-(2-bromobenzylidene)-4-methylbenzenesulfonamide (**2a**) in  $\text{CDCl}_3$ .

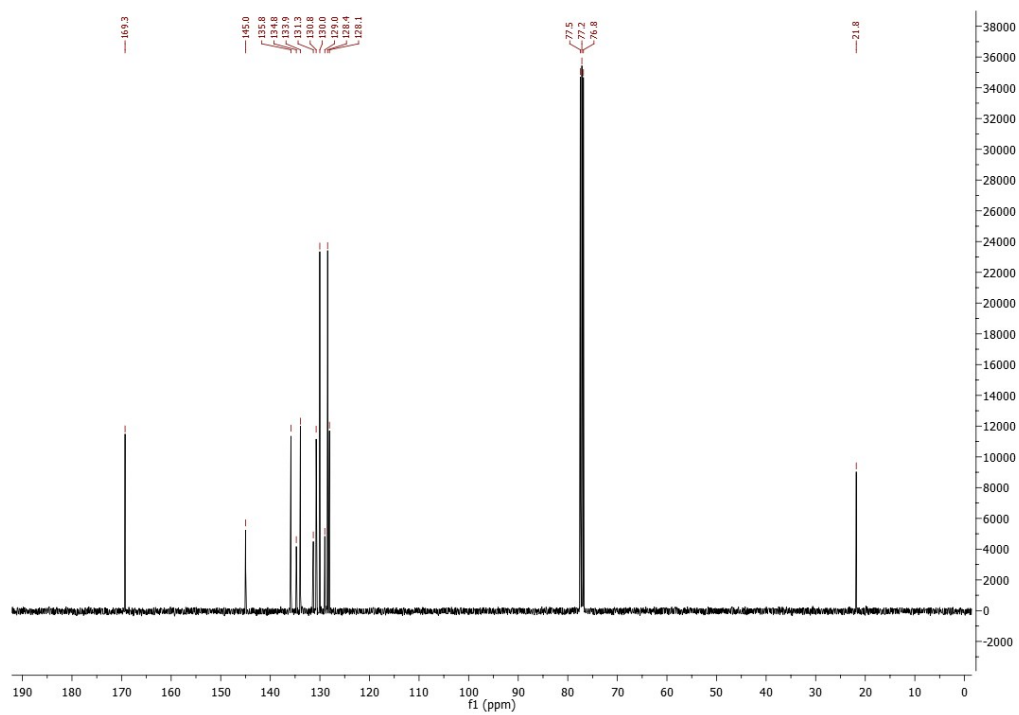

Figura S2.  $^{13}\text{C}$  NMR spectrum of *N*-(2-bromobenzylidene)-4-methylbenzenesulfonamide (**2a**) in  $\text{CDCl}_3$ .

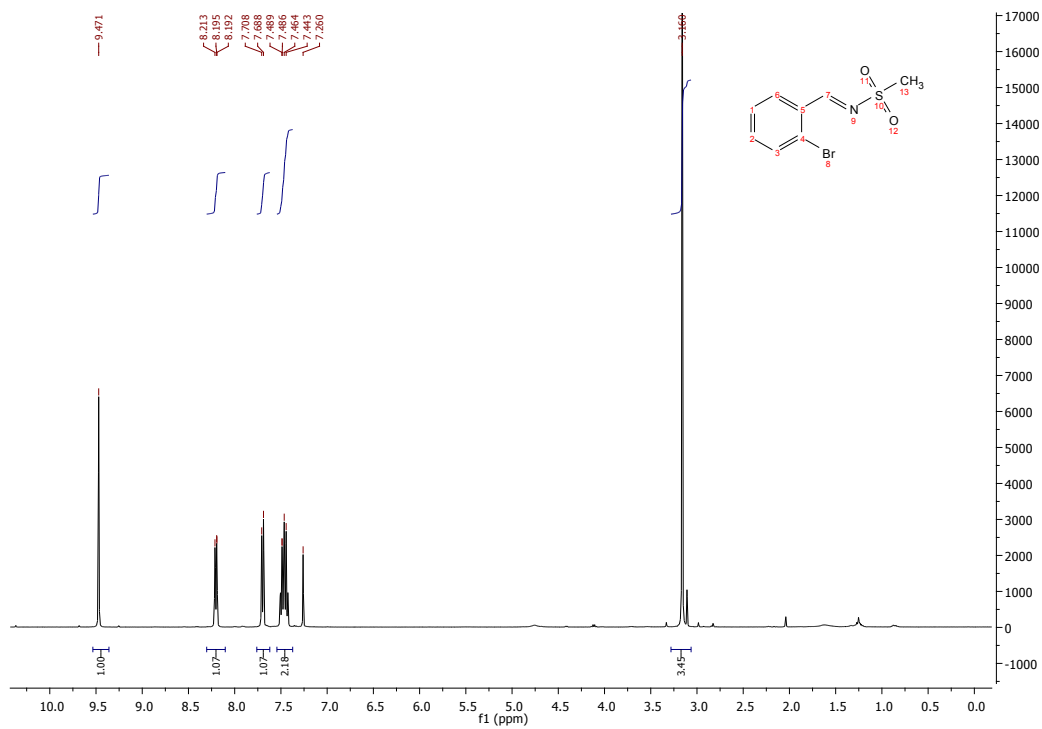

Figure S3. <sup>1</sup>H NMR spectrum of *N*-(2-Bromobenzylidene)methanesulfonamide (**2b**) in CDCl<sub>3</sub>.

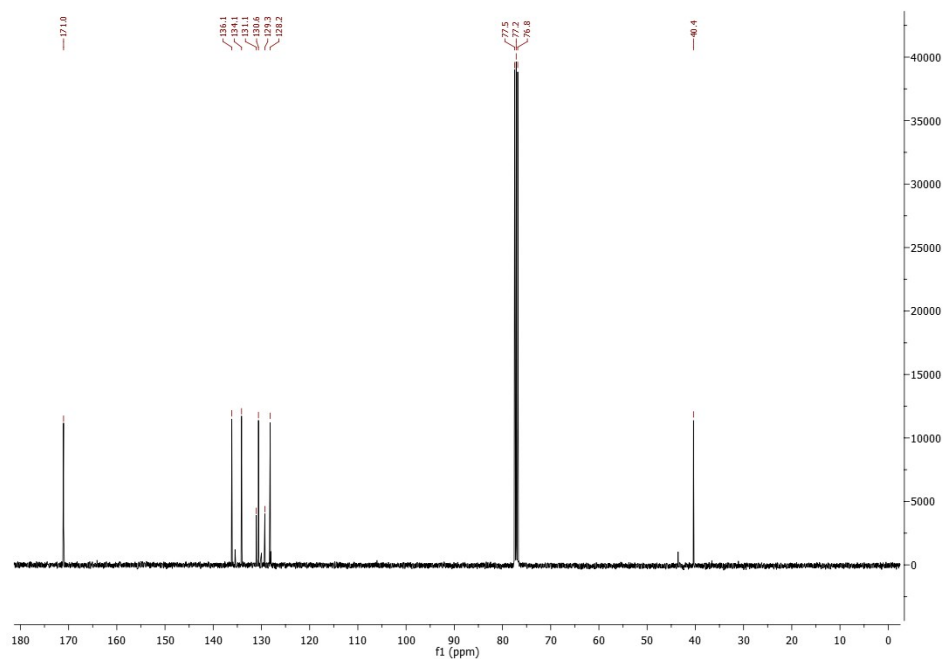

Figure S4. <sup>13</sup>C NMR spectrum of *N*-(2-Bromobenzylidene)methanesulfonamide (**2b**) in CDCl<sub>3</sub>.

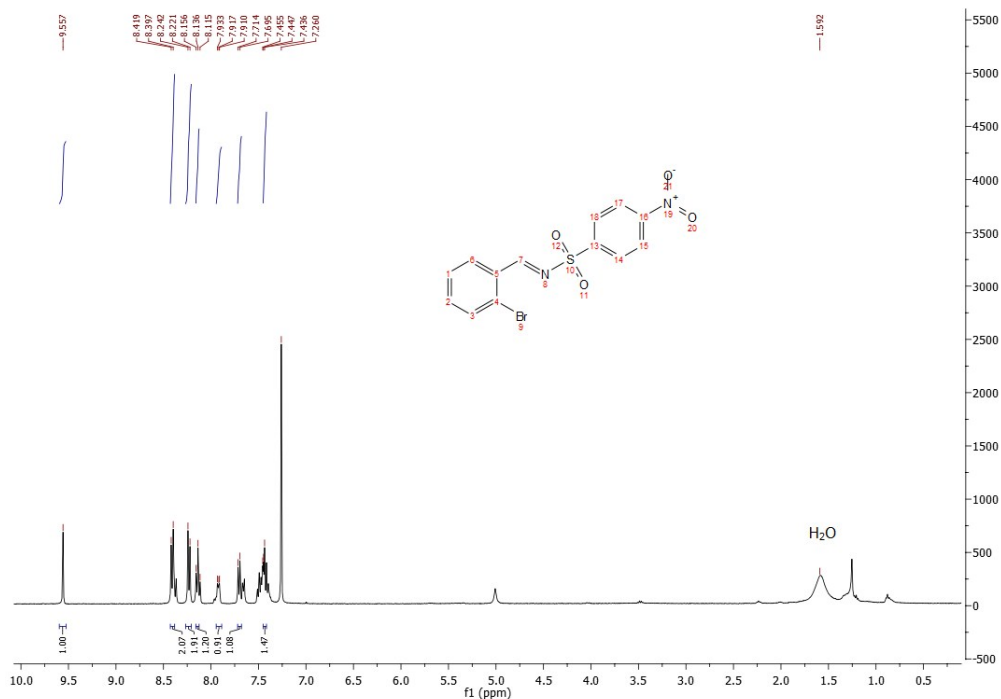

Figure S5. <sup>1</sup>H NMR spectrum of *N*-(2-Bromobenzylidene)-4-nitrobenzenesulfonamide (**2c**) in CDCl<sub>3</sub>.

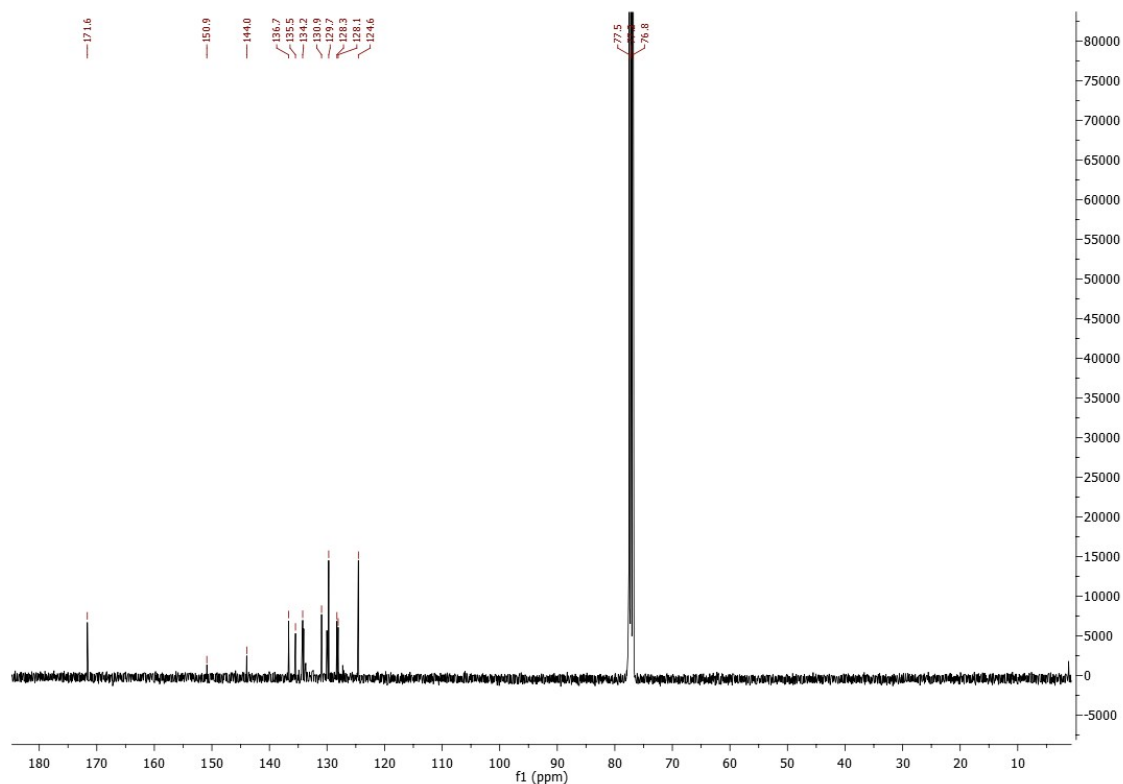

Figure S6. <sup>13</sup>C NMR spectrum of *N*-(2-Bromobenzylidene)-4-nitrobenzenesulfonamide (**2c**) in CDCl<sub>3</sub>.

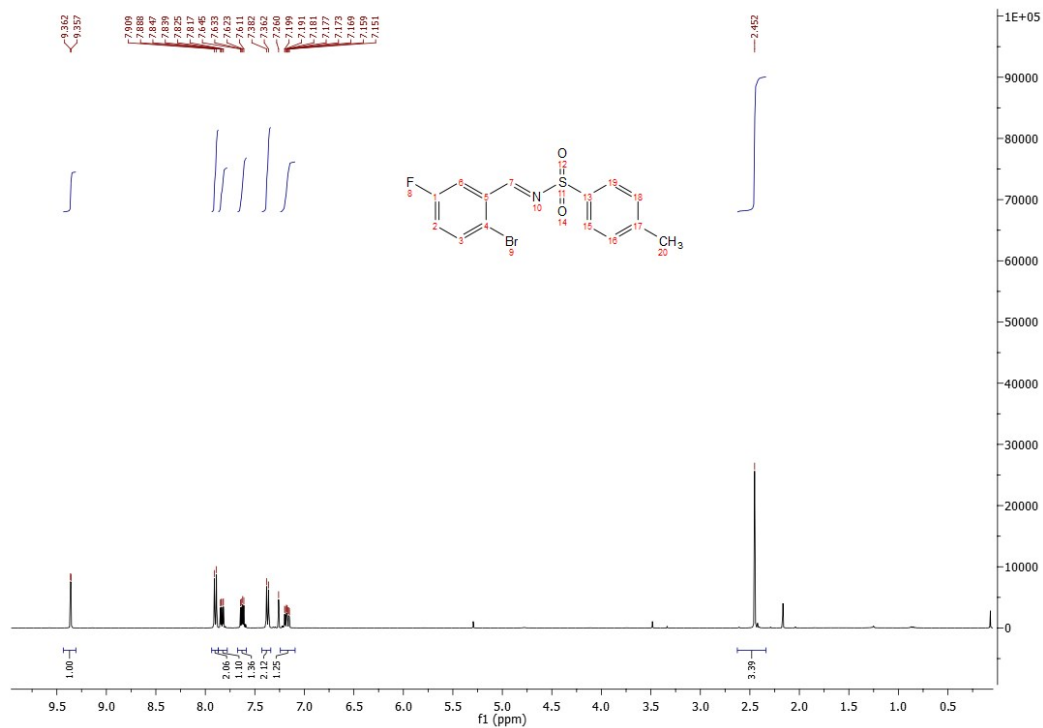

Figure S7. <sup>1</sup>H NMR spectrum of *N*-(2-bromo-5-fluorobenzylidene)-4-methylbenzenesulfonamide (**2d**) in CDCl<sub>3</sub>

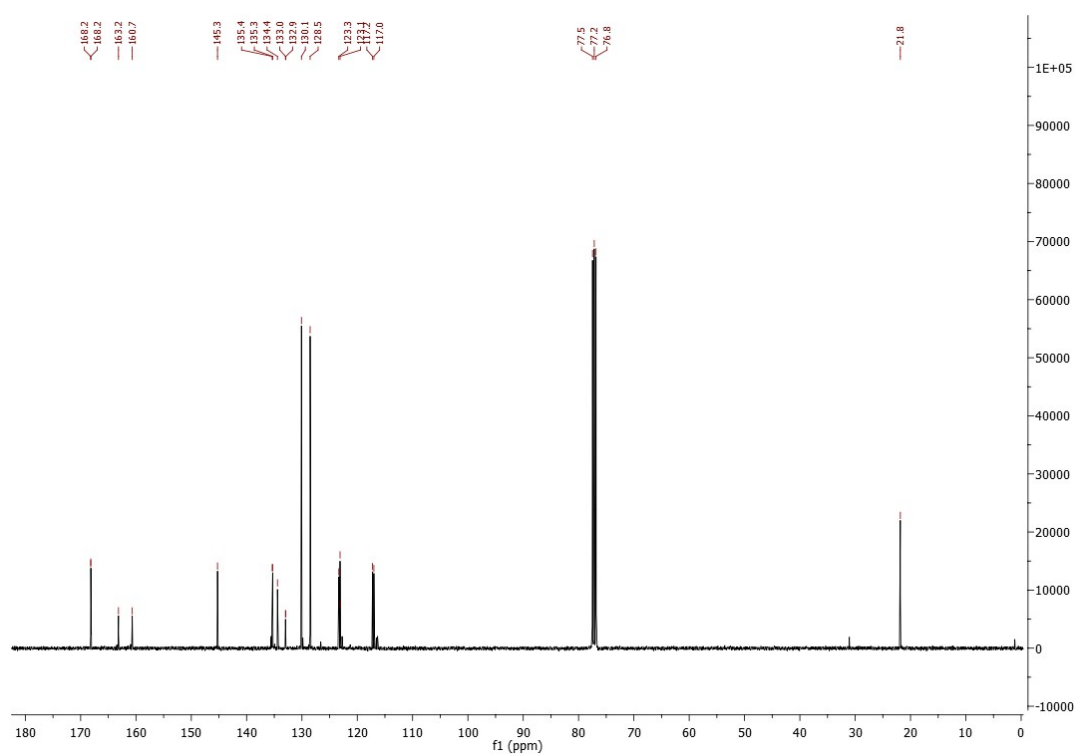

Figure S8. <sup>13</sup>C NMR spectrum of *N*-(2-bromo-5-fluorobenzylidene)-4-methylbenzenesulfonamide (**2d**) in CDCl<sub>3</sub>.



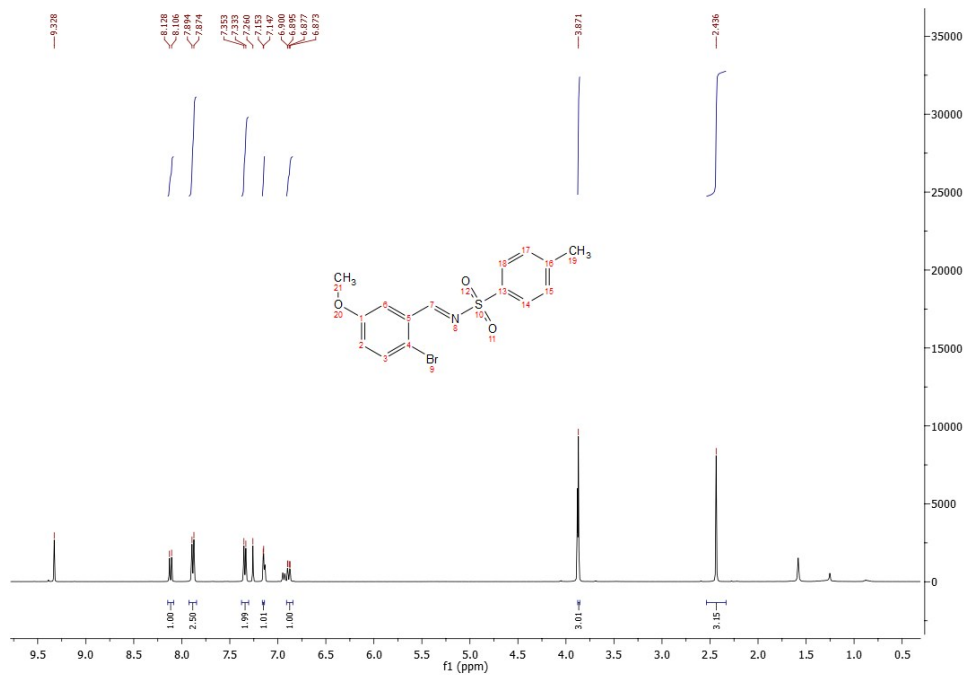

Figure S9. <sup>1</sup>H NMR spectrum of *N*-(2-Bromo-4-methoxybenzylidene)-4-methylbenzenesulfonamide (**2f**) in CDCl<sub>3</sub>.

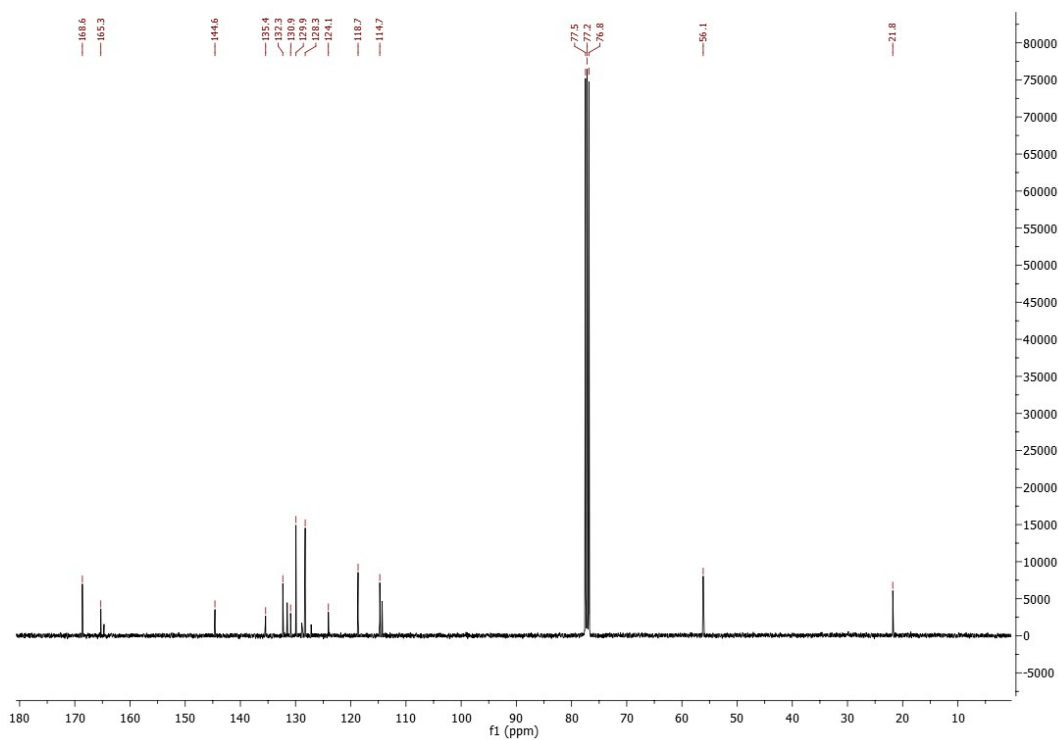

Figure S10. <sup>13</sup>C NMR spectrum of *N*-(2-Bromo-4-methoxybenzylidene)-4-methylbenzenesulfonamide (**2f**) in CDCl<sub>3</sub>.

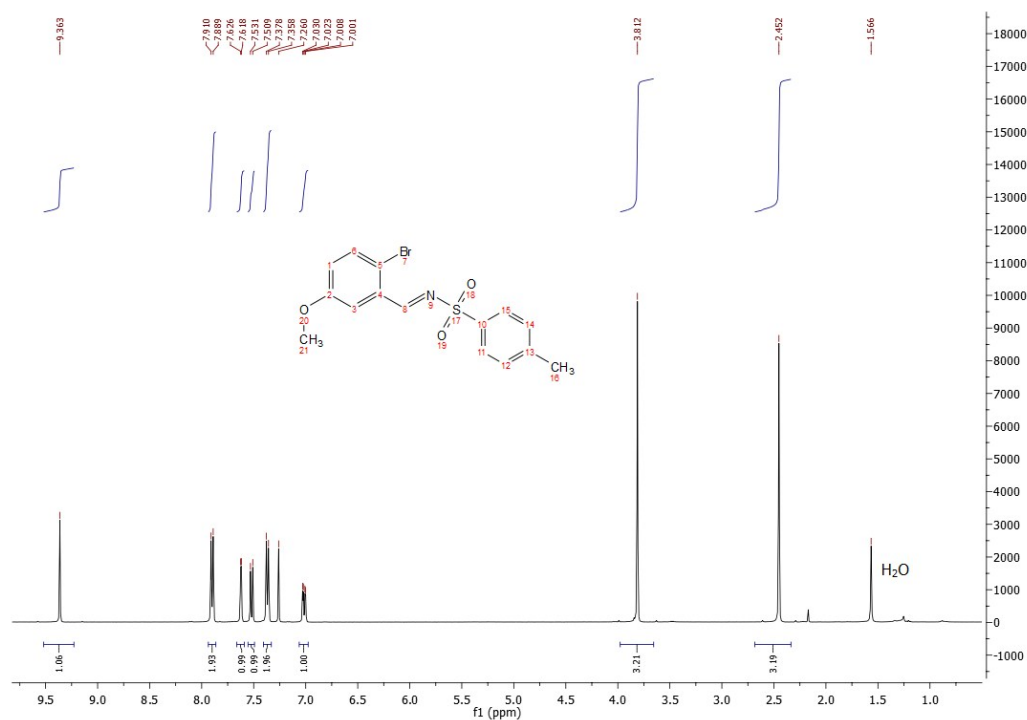

Figure S11. <sup>1</sup>H NMR spectrum of *N*-(2-Bromo-5-methoxybenzylidene)-4-methylbenzenesulfonamide (**2e**) in CDCl<sub>3</sub>.

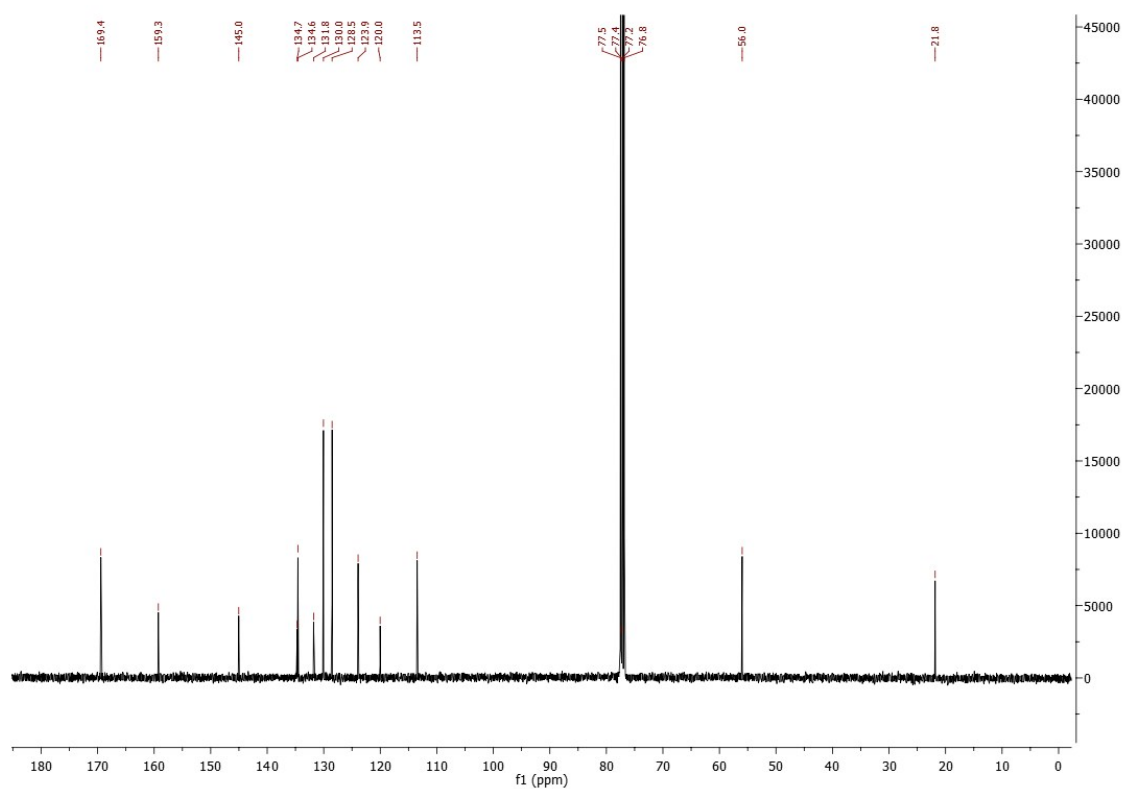

Figure S12. <sup>13</sup>C NMR spectrum of *N*-(2-Bromo-5-methoxybenzylidene)-4-methylbenzenesulfonamide (**2e**) in CDCl<sub>3</sub>.

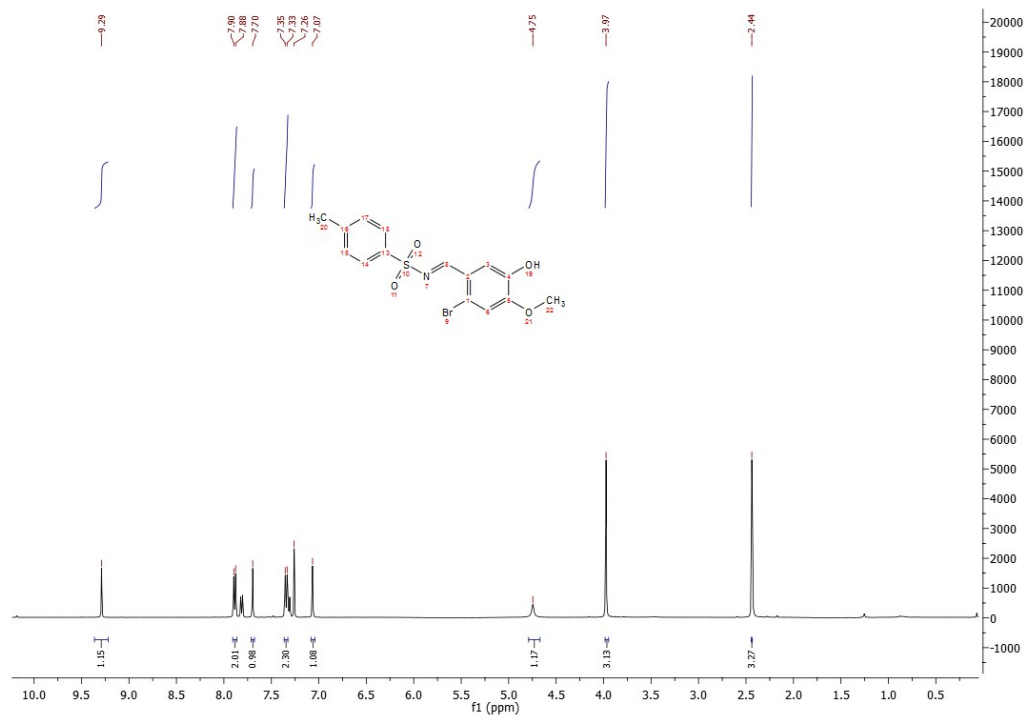

Figure S13. <sup>1</sup>H NMR spectrum of *N*-(2-Bromo-5-hydroxy-4-methoxybenzylidene)-4-methylbenzenesulfonamide (**2g**) in CDCl<sub>3</sub>.

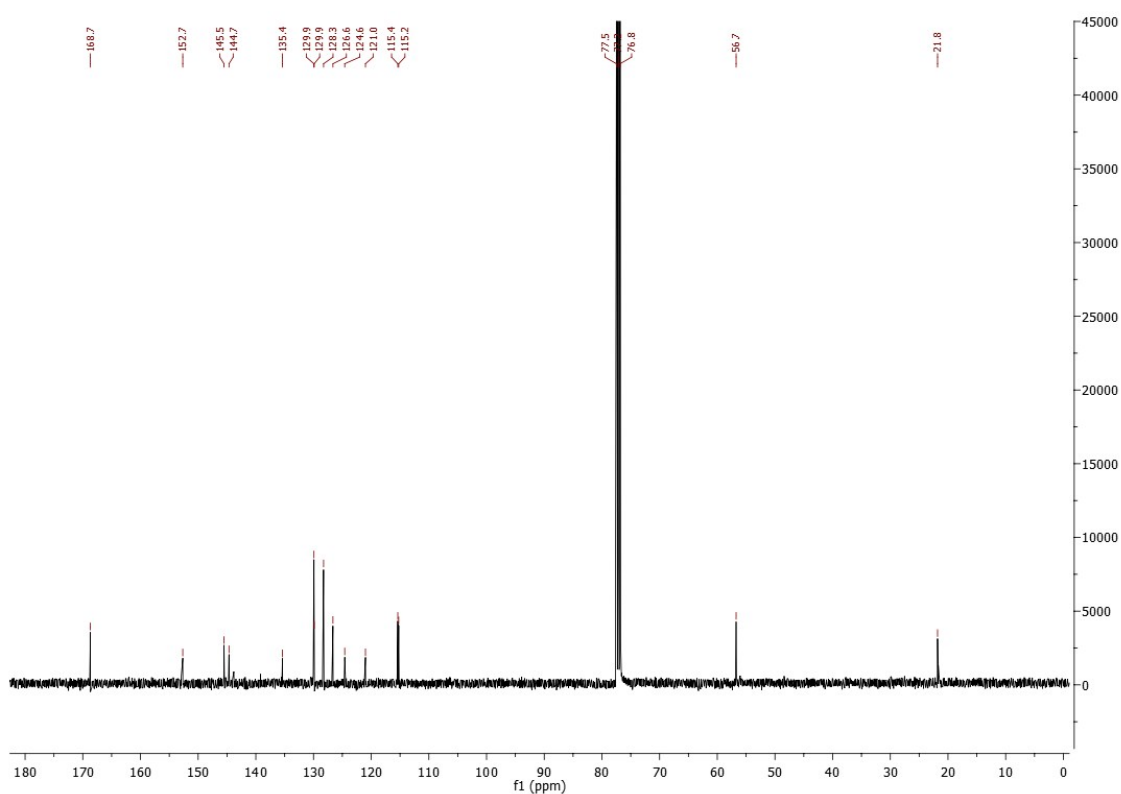

Figure S14. <sup>13</sup>C NMR spectrum of *N*-(2-Bromo-5-hydroxy-4-methoxybenzylidene)-4-methylbenzenesulfonamide (**2g**) in CDCl<sub>3</sub>.

NMR Spectra ( $^1\text{H}$  400MHz;  $^{13}\text{C}$  100MHz) for DBDA (4) and compounds (5) and (6):

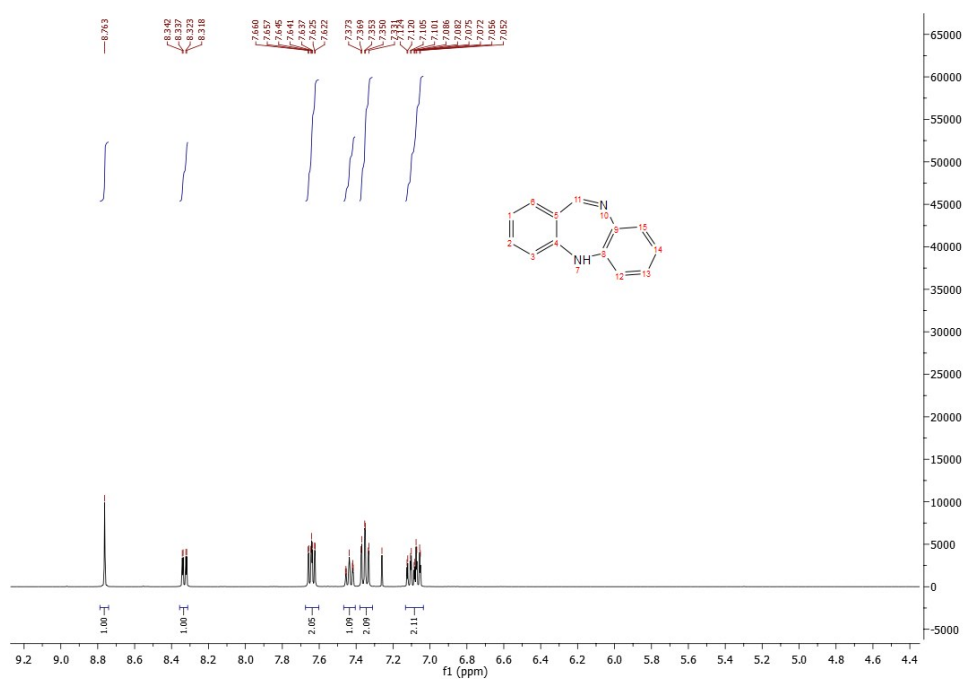

Figure S15.  $^1\text{H}$  NMR spectrum of 5H-dibenzo[*b,e*][1,4]diazepine (4aa) in  $\text{CDCl}_3$ .

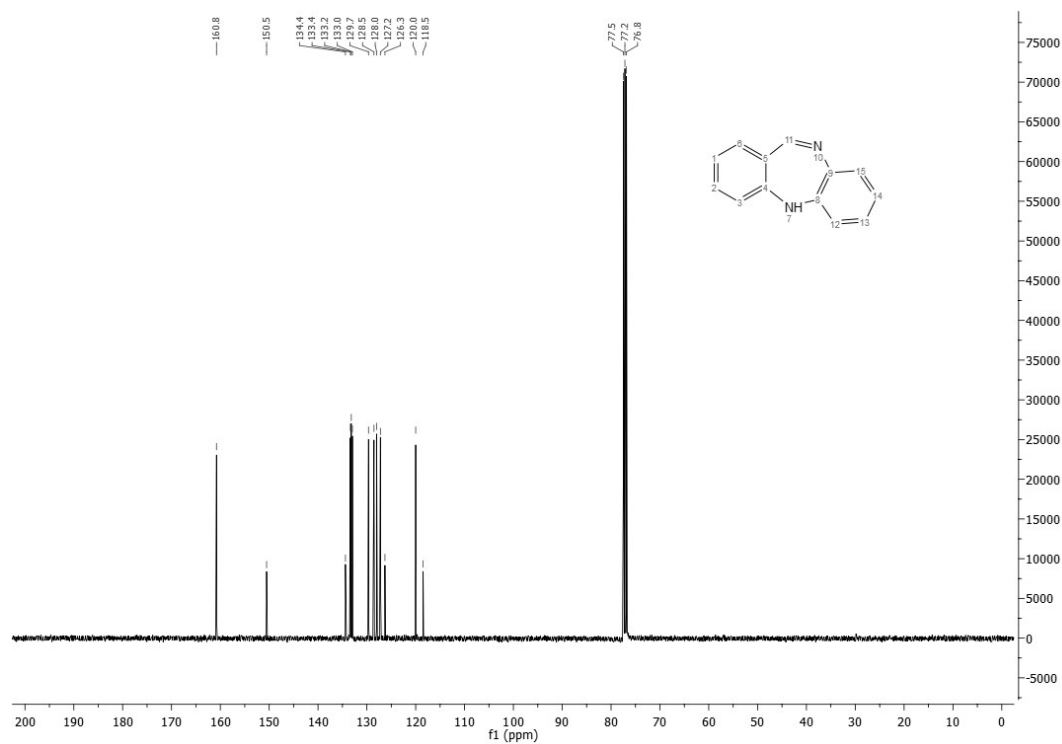

Figure S16.  $^{13}\text{C}$  NMR spectrum of 5H-dibenzo[*b,e*][1,4]diazepine (4aa) in  $\text{CDCl}_3$ .

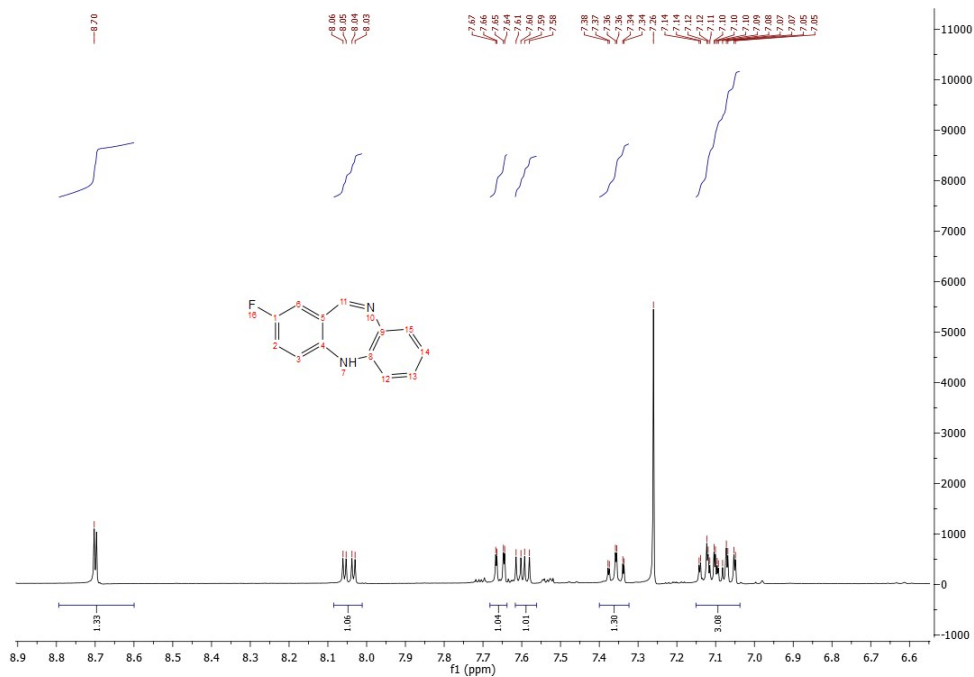

Figure S17.  $^1\text{H}$  NMR spectrum of 2-fluoro-5*H*-dibenzo[*b,e*][1,4]diazepine (**4da**) in  $\text{CDCl}_3$ .

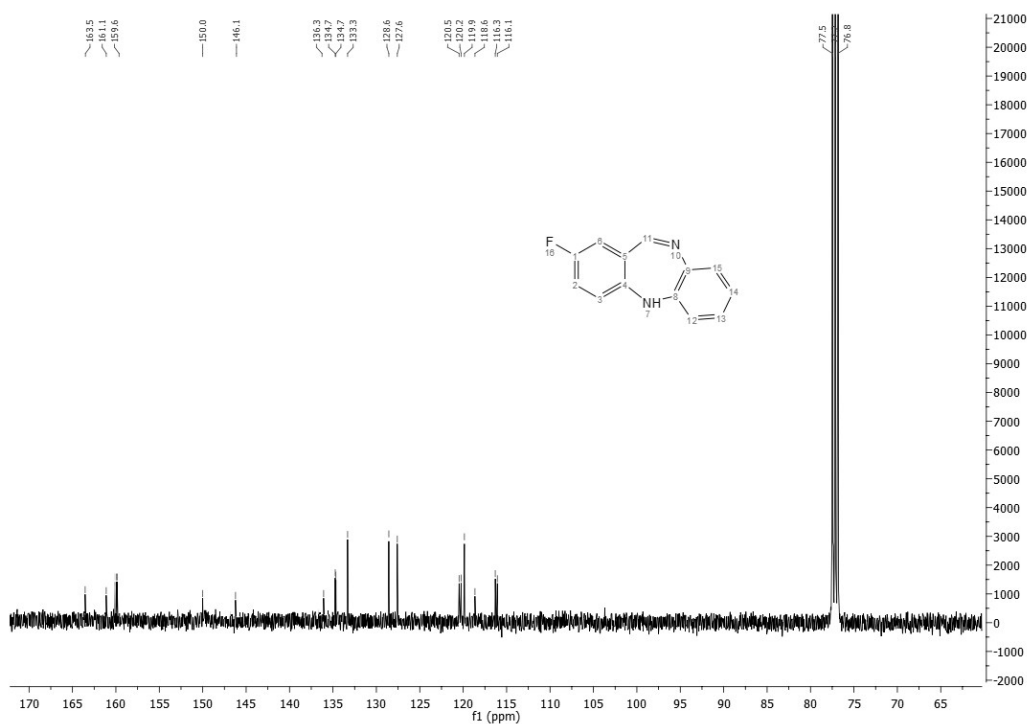

Figure S18.  $^{13}\text{C}$  NMR spectrum of 2-fluoro-5*H*-dibenzo[*b,e*][1,4]diazepine (**4da**) in  $\text{CDCl}_3$ .

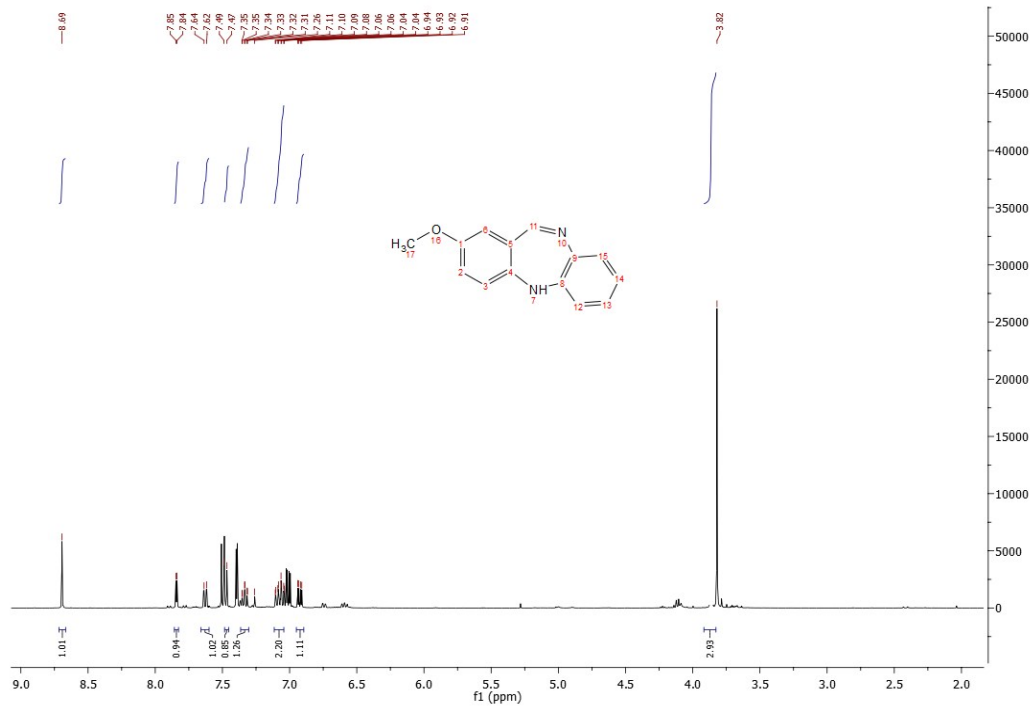

Figure S19. <sup>1</sup>H NMR spectrum of 2-methoxy-5H-dibenzo[b,e][1,4]diazepine (**4ea**) in CDCl<sub>3</sub>.

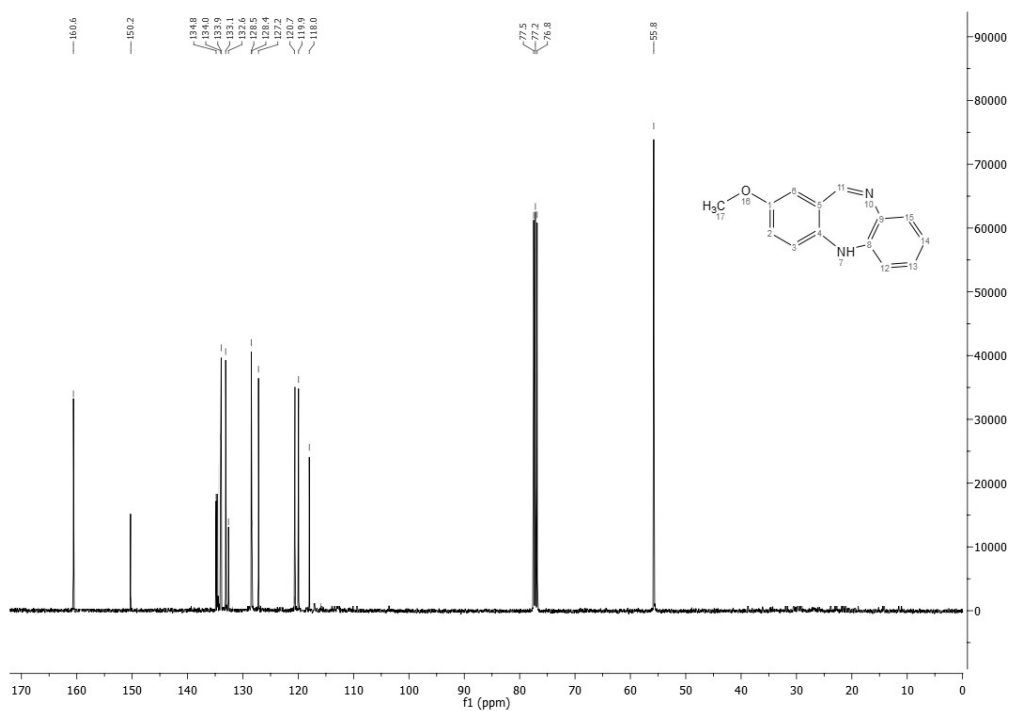

Figure S20. <sup>13</sup>C NMR spectrum of 2-methoxy-5H-dibenzo[b,e][1,4]diazepine (**4ea**) in CDCl<sub>3</sub>.

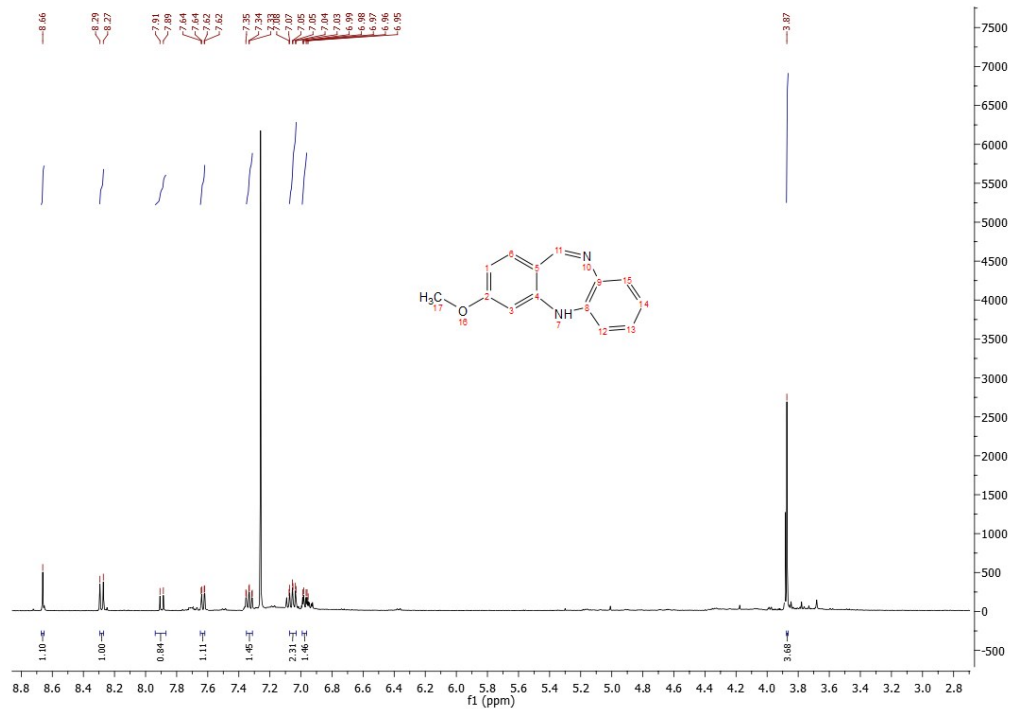

Figure S21. <sup>1</sup>H NMR spectrum of 3-methoxy-5*H*-dibenzo[*b,e*][1,4]diazepine (**4fa**) in CDCl<sub>3</sub>.

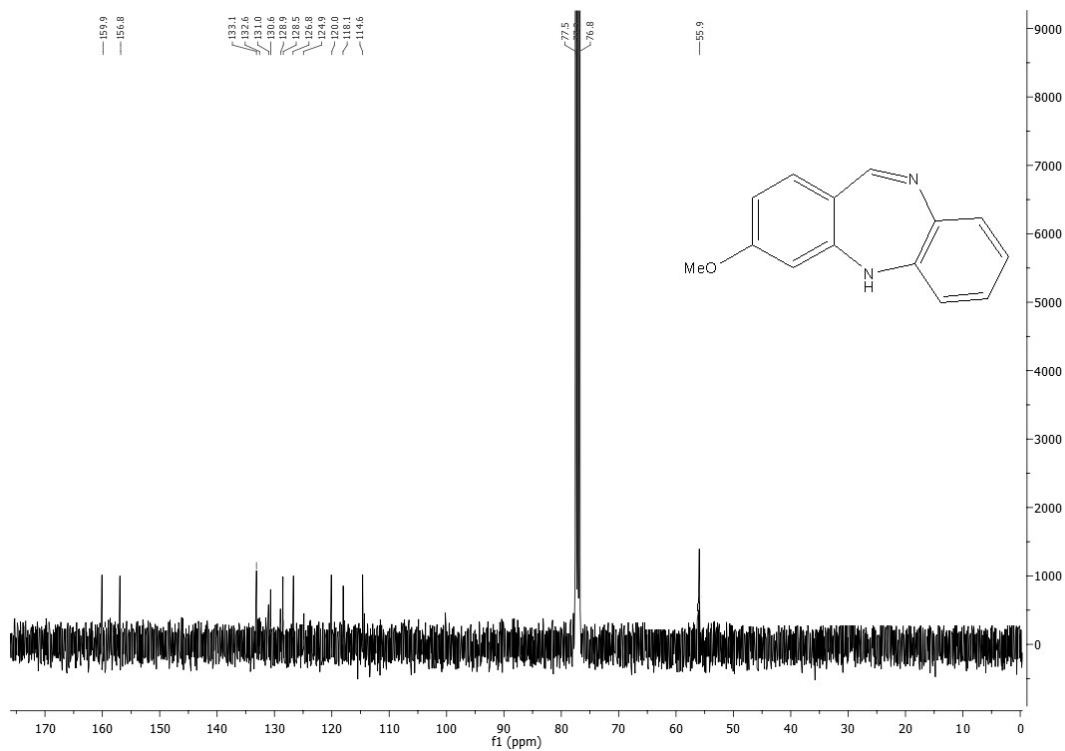

Figure S22. <sup>13</sup>C NMR spectrum of 3-methoxy-5*H*-dibenzo[*b,e*][1,4]diazepine (**4fa**) in CDCl<sub>3</sub>.

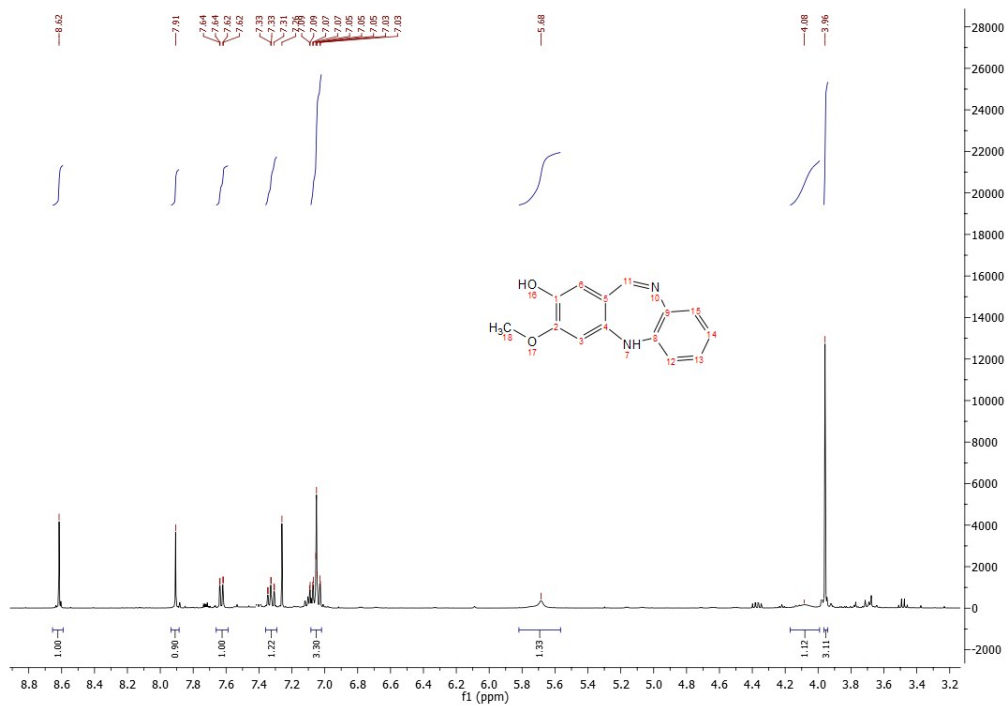

Figure S23.  $^1\text{H}$  NMR spectrum of 3-methoxy-5H-dibenzo[b,e][1,4]diazepin-2-ol (**4ga**)  $\text{CDCl}_3$ .

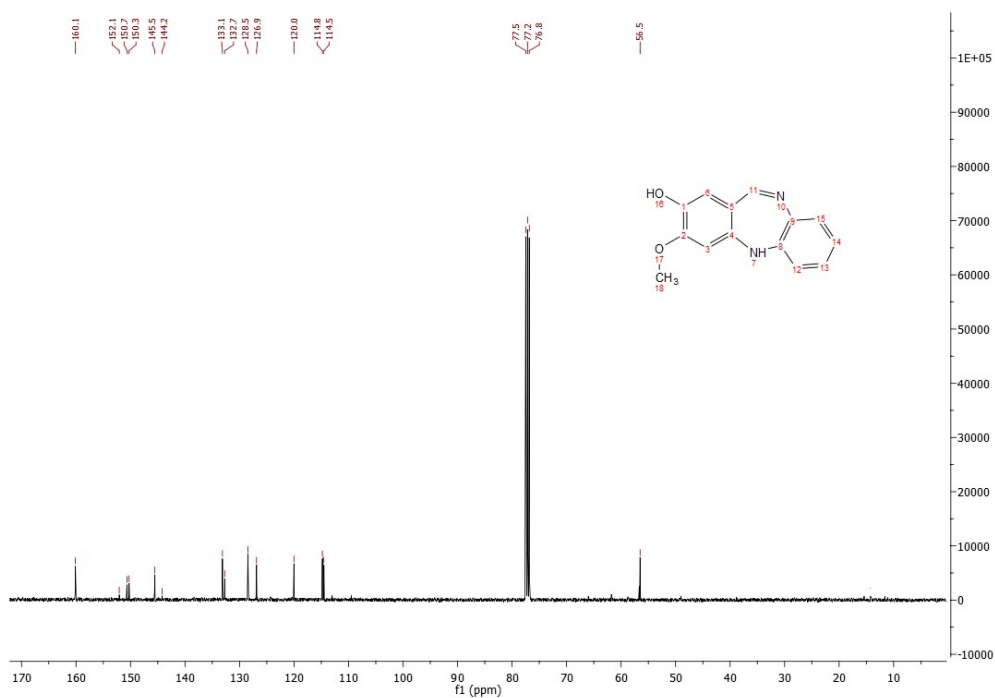

Figure S24.  $^{13}\text{C}$  NMR spectrum of 3-methoxy-5H-dibenzo[b,e][1,4]diazepin-2-ol (**4ga**) in  $\text{CDCl}_3$ .



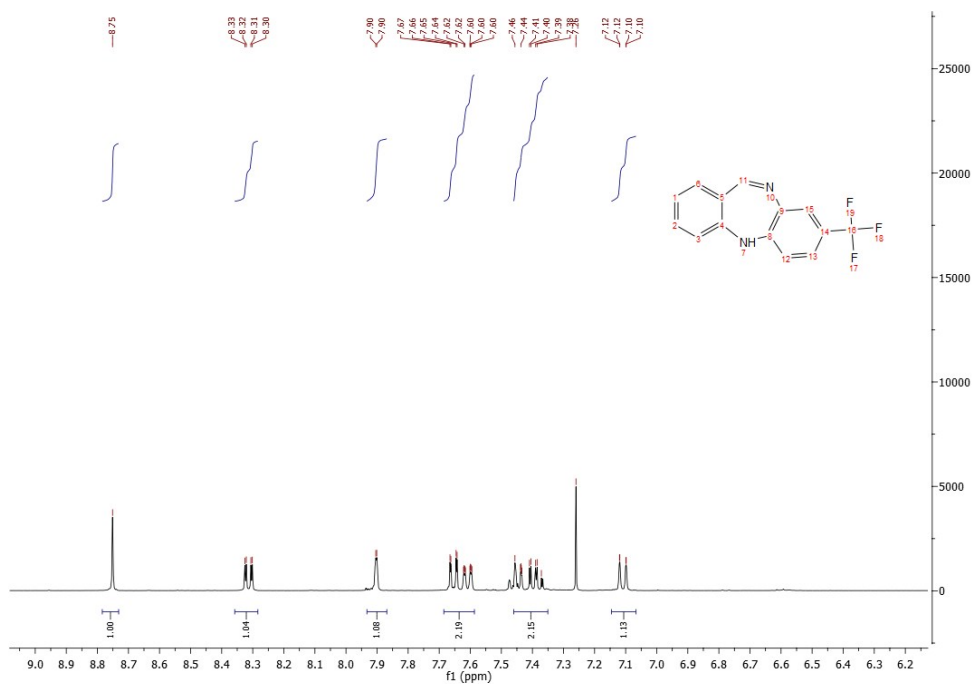

Figure S25. <sup>1</sup>H NMR spectrum of 8-(trifluoromethyl)-5H-dibenzo[b,e][1,4]diazepine (**4ab**) in CDCl<sub>3</sub>.

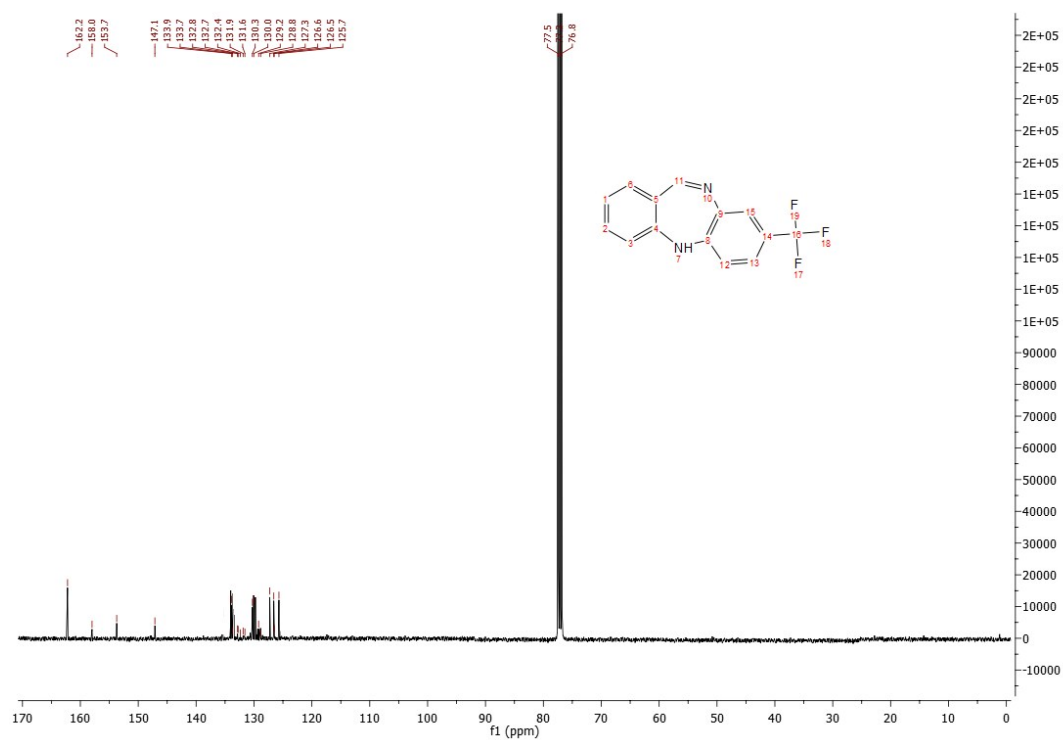

Figure S26. <sup>13</sup>C NMR spectrum of 8-(trifluoromethyl)-5H-dibenzo[b,e][1,4]diazepine (**4ab**) in CDCl<sub>3</sub>.

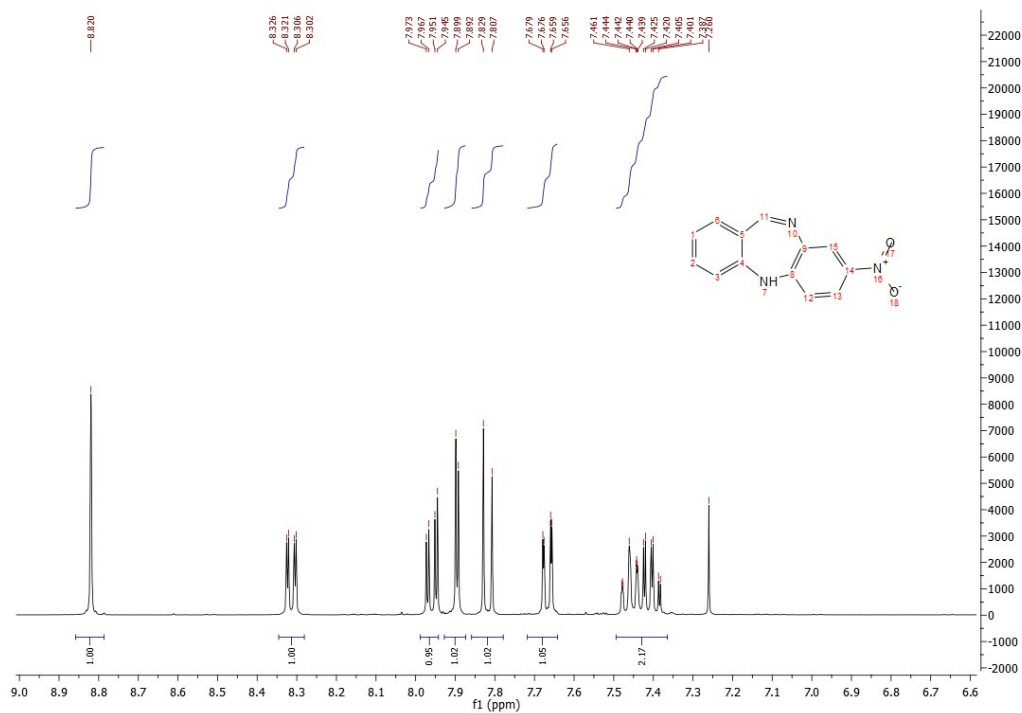

Figure S27.  $^1\text{H}$  NMR spectrum of 7-nitro-5*H*-dibenzo[*b,e*][1,4]diazepine (**4ad**) in  $\text{CDCl}_3$ .

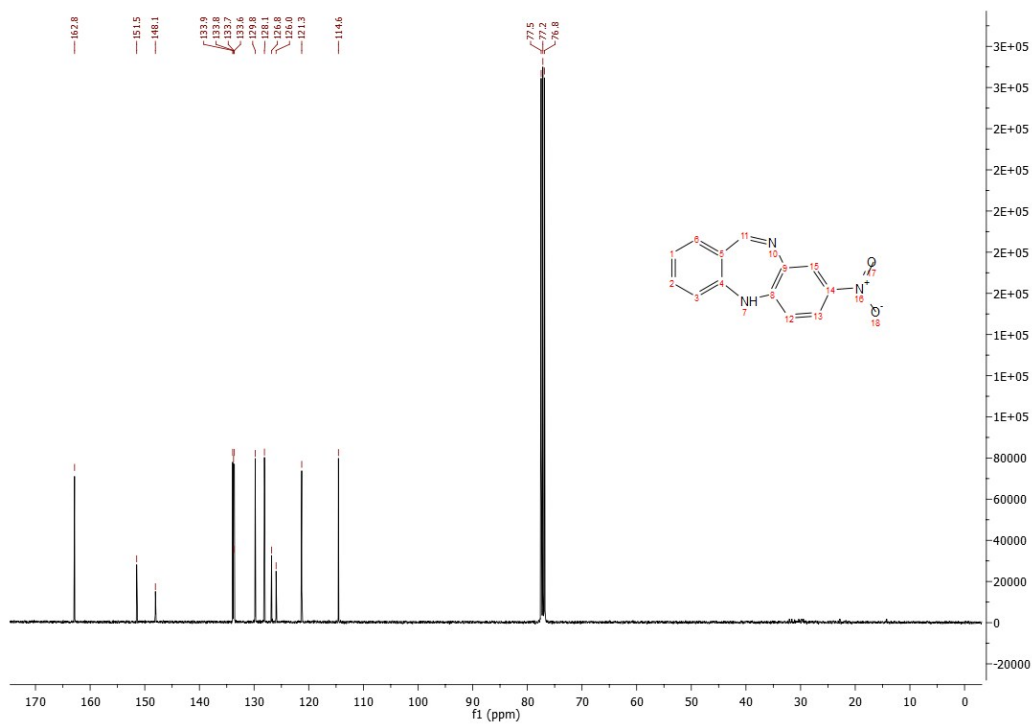

Figure S28.  $^{13}\text{C}$  NMR spectrum of 7-nitro-5*H*-dibenzo[*b,e*][1,4]diazepine (**4ad**) in  $\text{CDCl}_3$ .

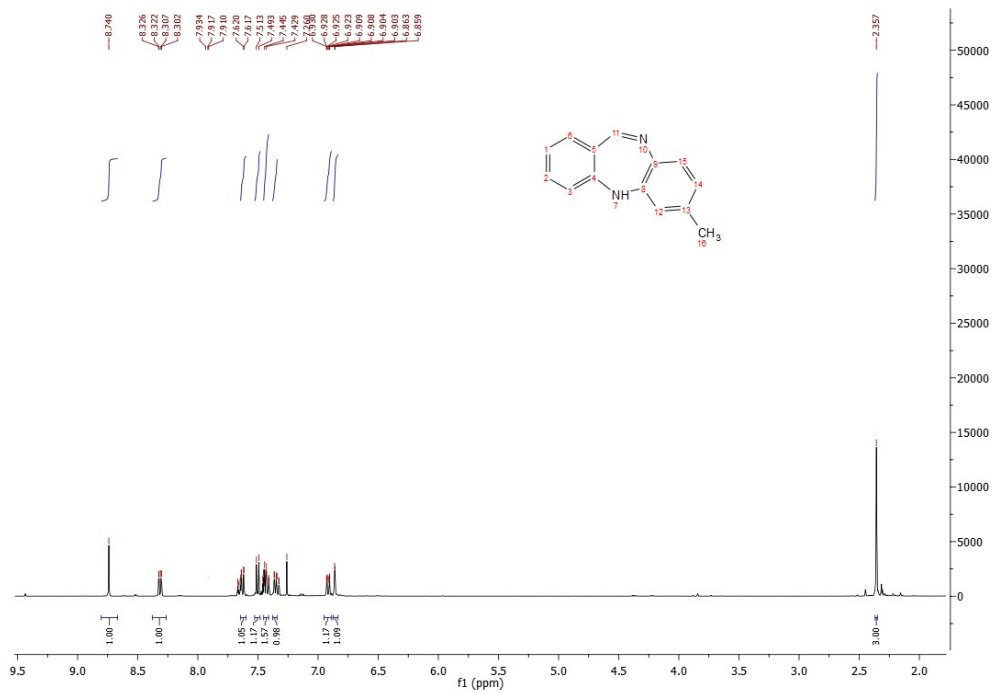

Figure S29. <sup>1</sup>H NMR spectrum of 7-methyl-5H-dibenzo[b,e][1,4]diazepine (**4ac**) in CDCl<sub>3</sub>.

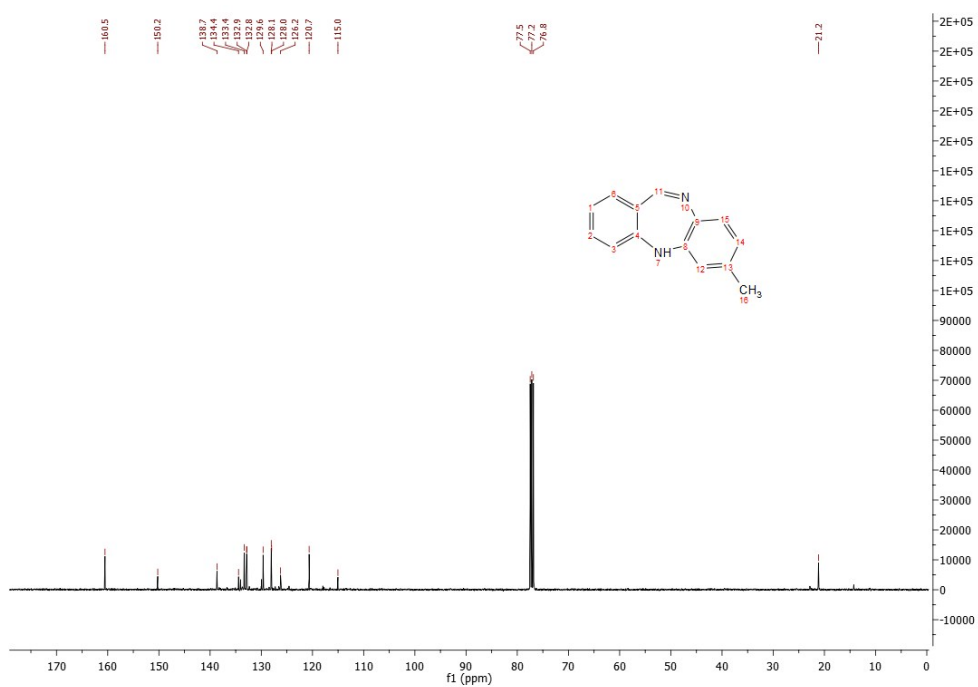

Figure S30. <sup>13</sup>C NMR spectrum of 7-methyl-5H-dibenzo[b,e][1,4]diazepine (**4ac**) in CDCl<sub>3</sub>.

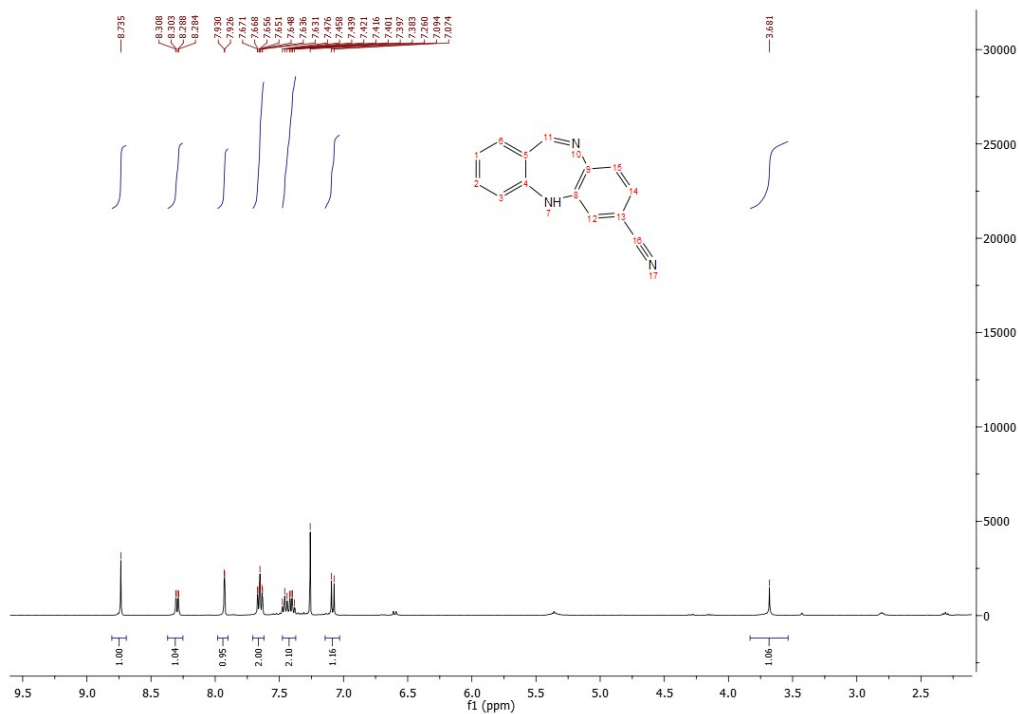

Figure S31. <sup>1</sup>H NMR spectrum of 5H-dibenzo[b,e][1,4]diazepine-7-carbonitrile (**4ae**) in CDCl<sub>3</sub>.

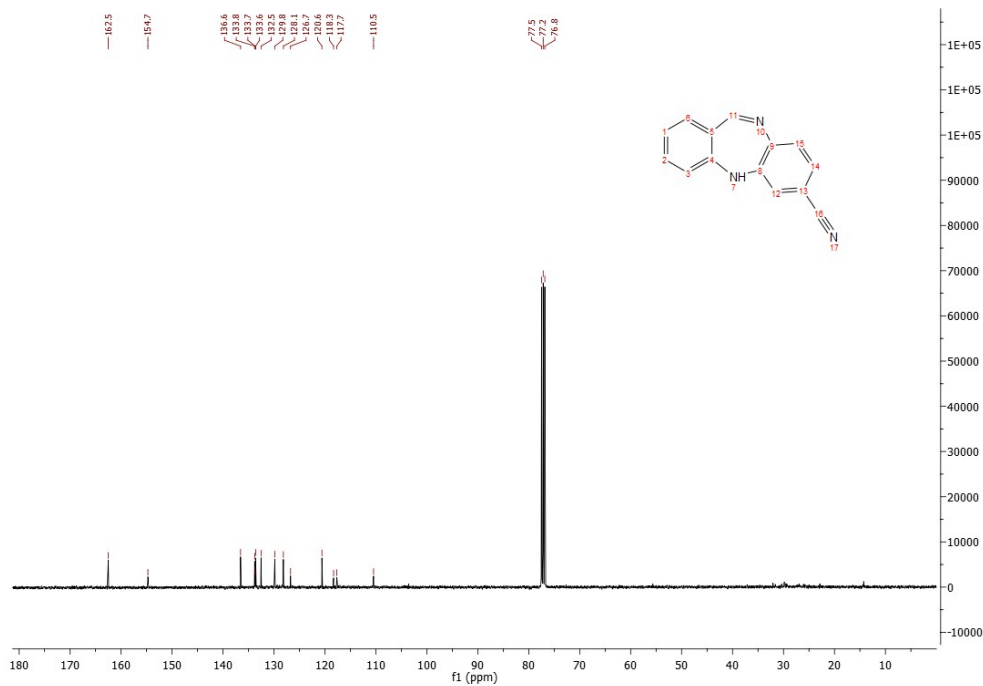

Figure S32. <sup>13</sup>C NMR spectrum of 5H-dibenzo[b,e][1,4]diazepine-7-carbonitrile (**4ae**) in CDCl<sub>3</sub>.

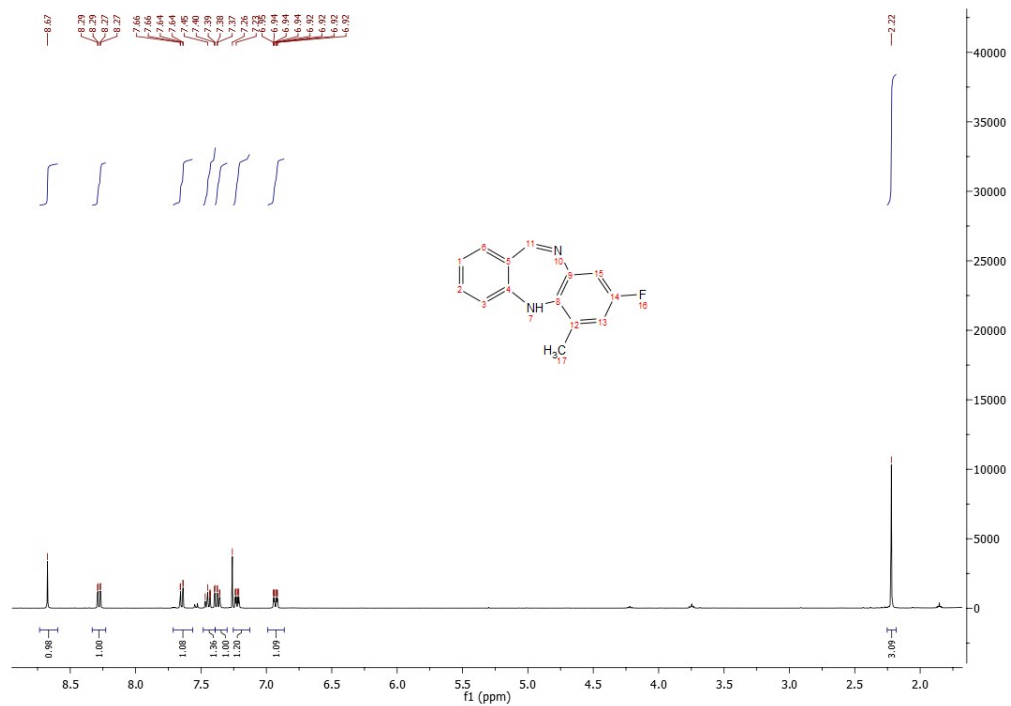

Figure S33.  $^1\text{H}$  NMR spectrum of 8-fluoro-6-methyl-5H-dibenzo[b,e][1,4]diazepine (4af) in  $\text{CDCl}_3$ .

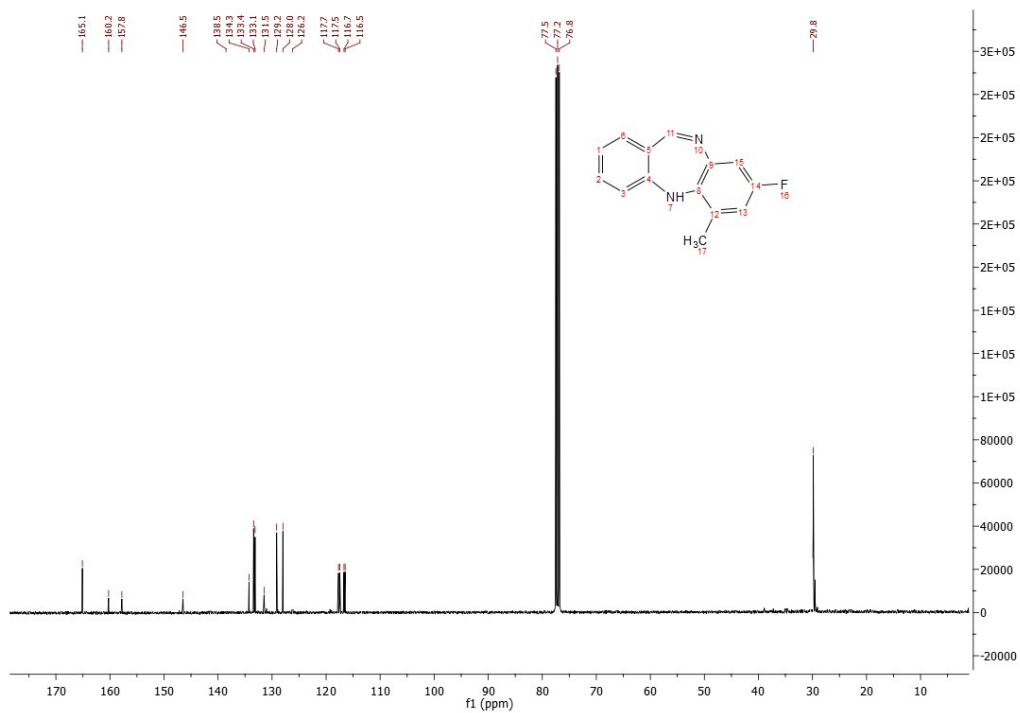

Figure S34.  $^{13}\text{C}$  NMR spectrum of 8-fluoro-6-methyl-5H-dibenzo[b,e][1,4]diazepine (4af) in  $\text{CDCl}_3$ .

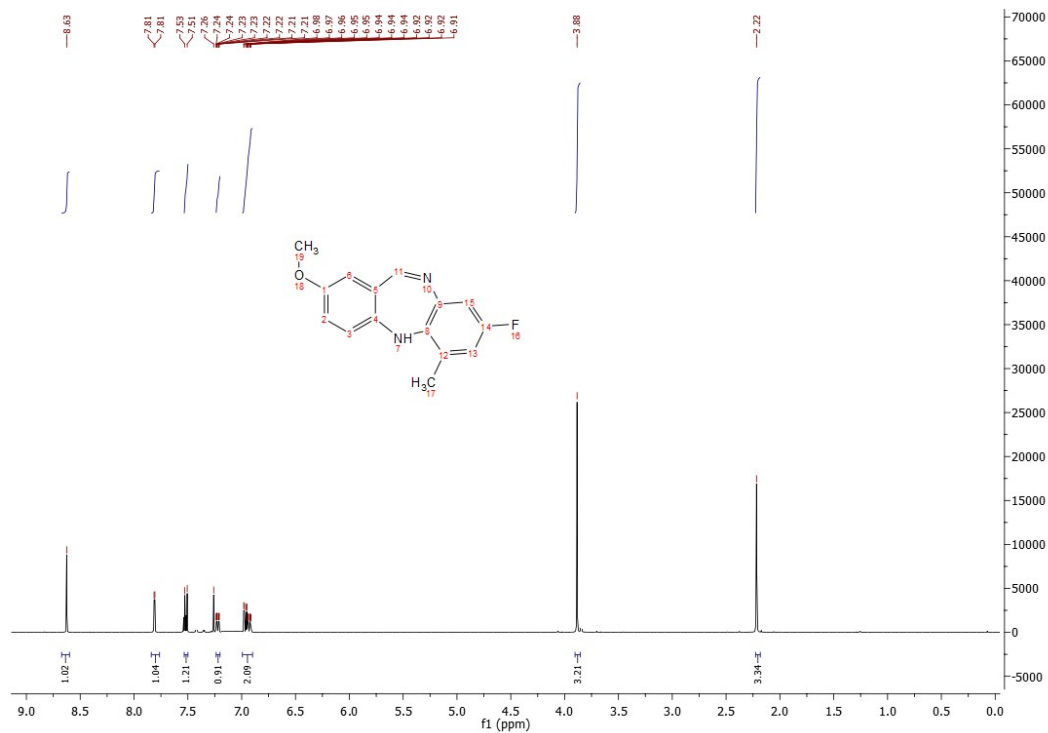

Figure S35. <sup>1</sup>H NMR spectrum of 8-fluoro-2-methoxy-6-methyl-5H-dibenzo[b,e][1,4]diazepine (**4ef**) in CDCl<sub>3</sub>.

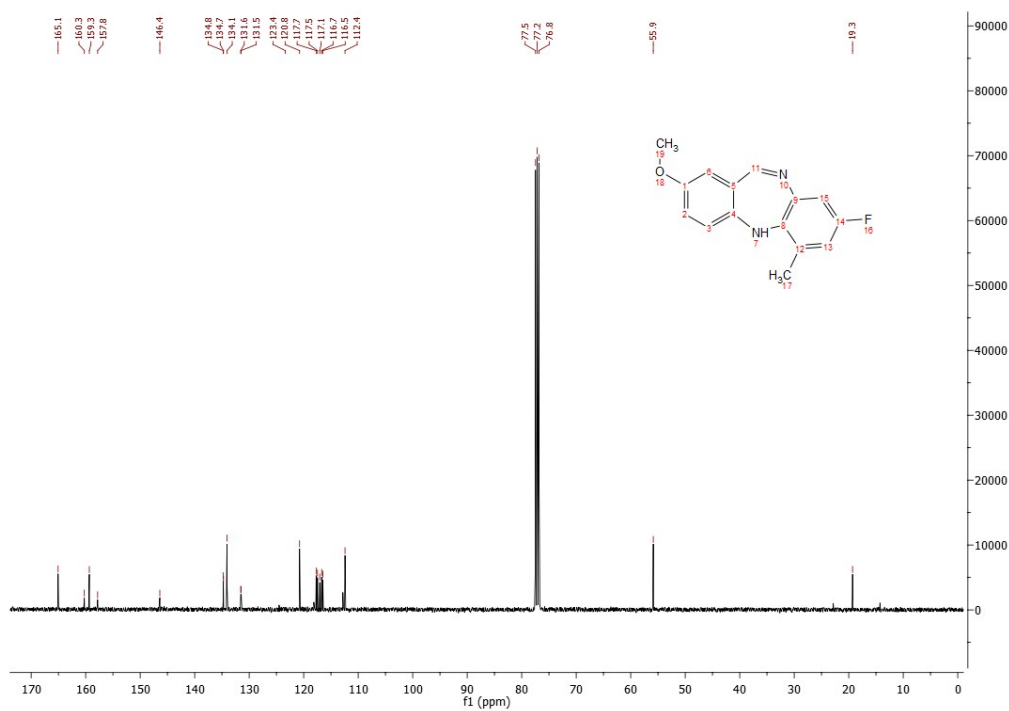

Figure S36. <sup>13</sup>C NMR spectrum of 8-fluoro-2-methoxy-6-methyl-5H-dibenzo[b,e][1,4]diazepine (**4ef**) in CDCl<sub>3</sub>.

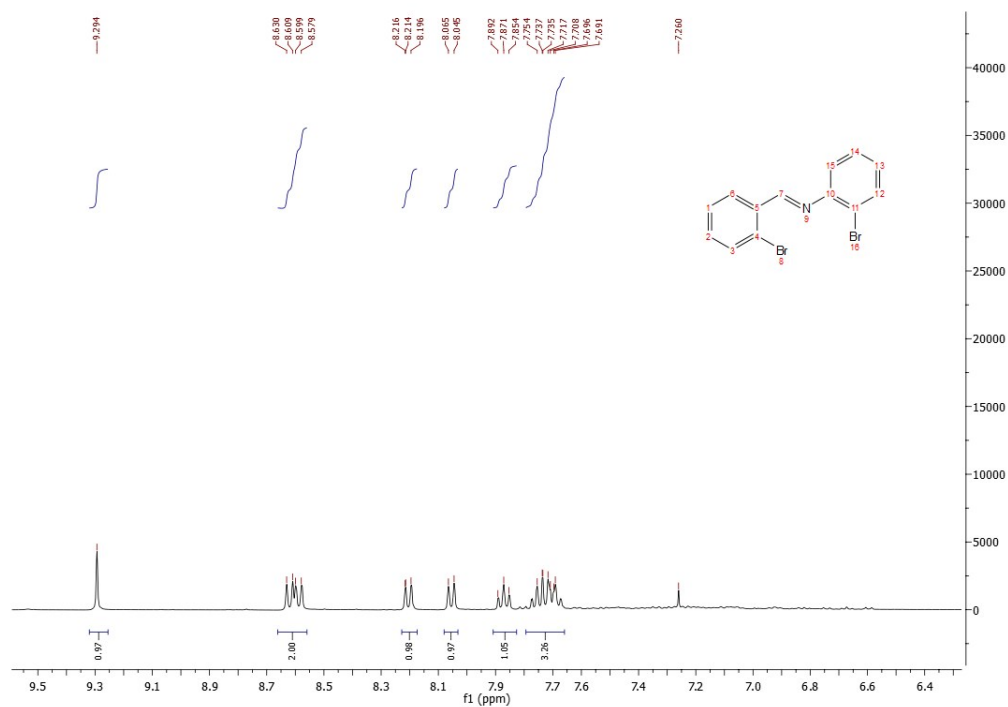

Figure S37.  $^1\text{H}$  NMR spectrum of (*E*)-2-bromo-*N*-(2-bromobenzylidene)aniline (**5**) in  $\text{CDCl}_3$ .

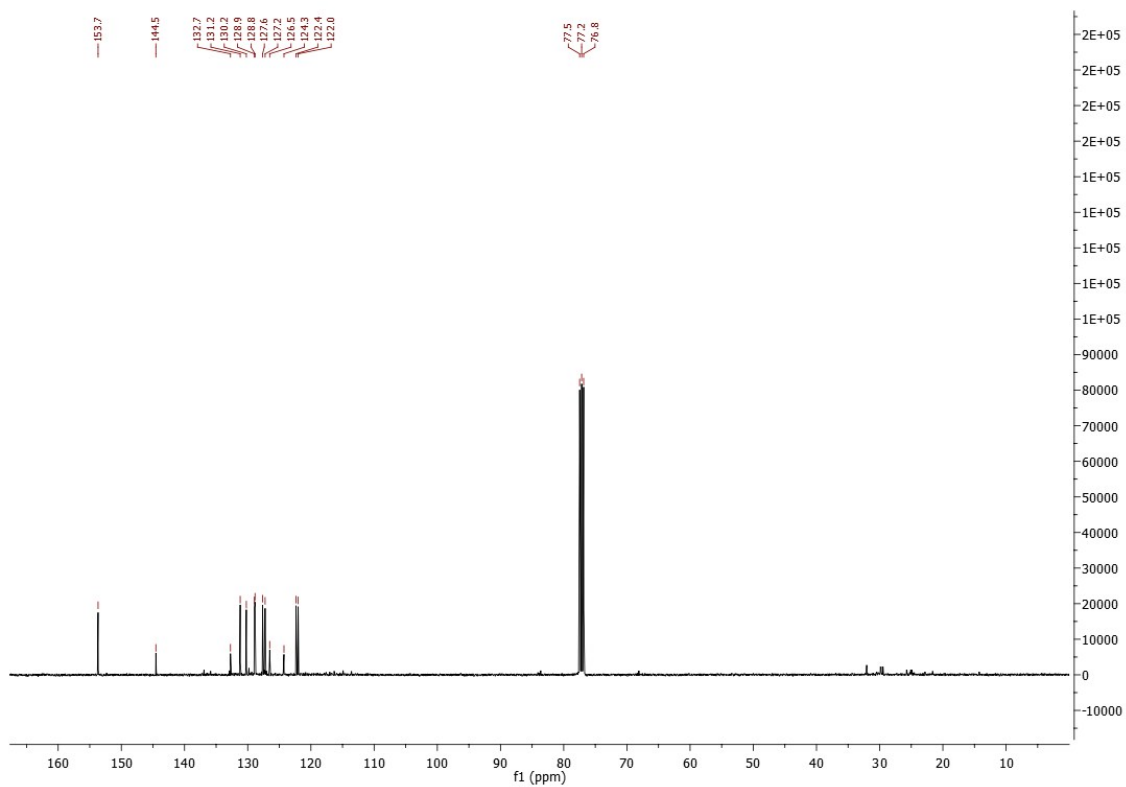

Figure S38.  $^{13}\text{C}$  NMR spectrum of (*E*)-2-bromo-*N*-(2-bromobenzylidene)aniline (**5**) in  $\text{CDCl}_3$ .

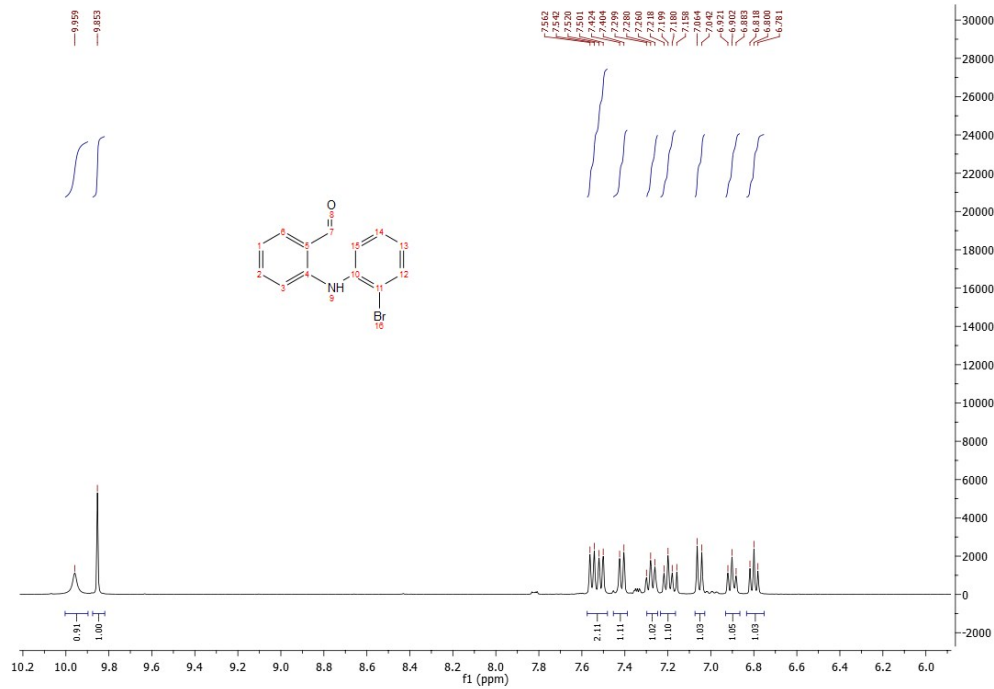

Figure S39. <sup>1</sup>H NMR spectrum of 2-(2-bromophenylamino)benzaldehyde (**6**) in CDCl<sub>3</sub>.

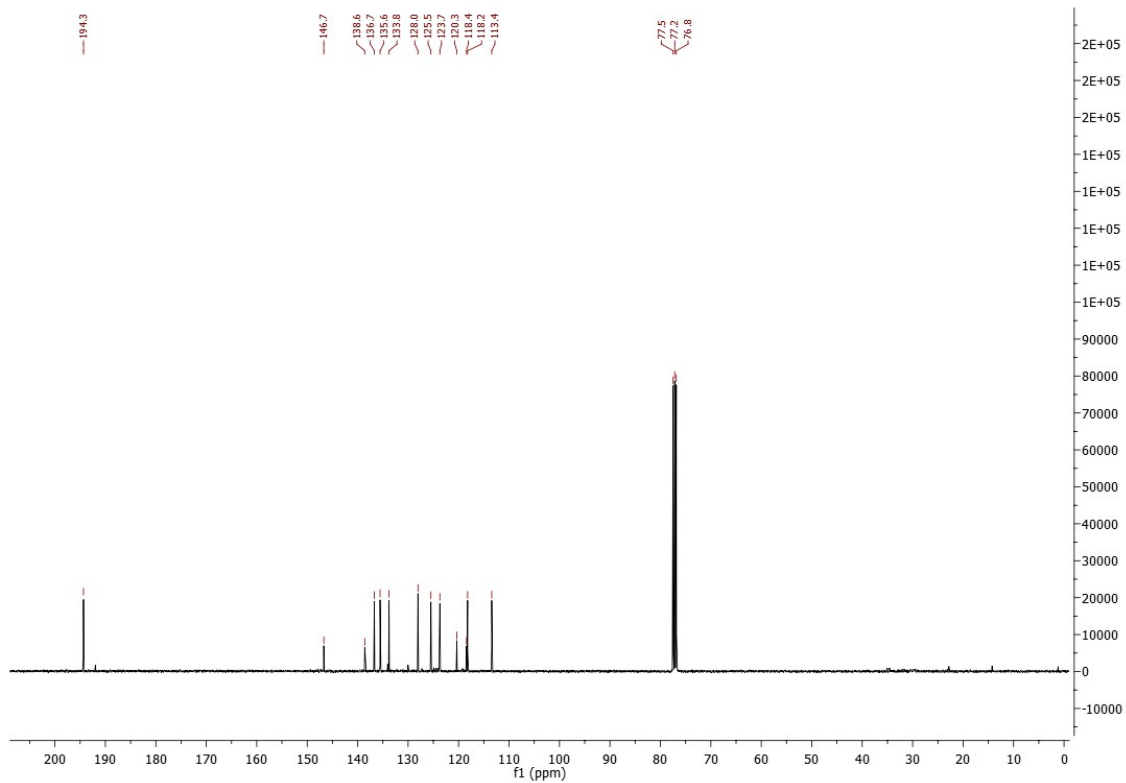

Figure S40. <sup>13</sup>C NMR spectrum of 2-(2-bromophenylamino)benzaldehyde (**6**) in CDCl<sub>3</sub>.



## Bond Dissociation Energy.

We looked at the Bond Dissociation Energy (BDE) of complexes **2a** and **3b**. The BDE is a way to measure the strength of a chemical bond. To calculate the BDE, one has to optimize each fragments (*i.e.* the radicals) obtained after breaking of the bond considered (Scheme S38).

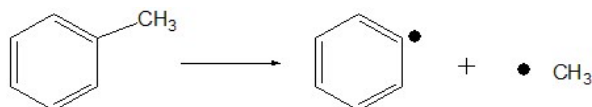

Scheme S38: Representation of an aromatic bond cleavage; formation of two radicals.

We performed calculations (at the exact same level theory as the optimizations) to get the BDE values of the following complexes (**2a** and **3b**) and the values are reported in Figure S39.

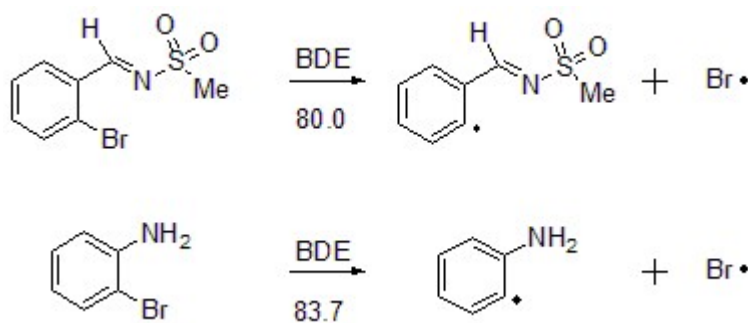

Figure S39: BDE values in kcal/mol, calculated at the DFT (M06) level, for the starting compounds.

Remarkably, we can observe that the C-Br bond of the bromophenyl amine is 3.7 kcal/mol stronger than the corresponding bond for the arylimine. The double bond of the imine is likely to stabilize the radical obtained after the C-Br bond cleavage in the case of **2a**. This is probably due to the fact that the imine, even if located one bond further, is still close enough to the aromatic ring. Aromatization allows the radical to be delocalized as far as the C=N bond. We computed the Mulliken spin density to confirm this hypothesis. The values are collected in Figure S40, and suggest that the radical is indeed delocalized onto the C=N bond. The delocalization does not reach the Ms-group.

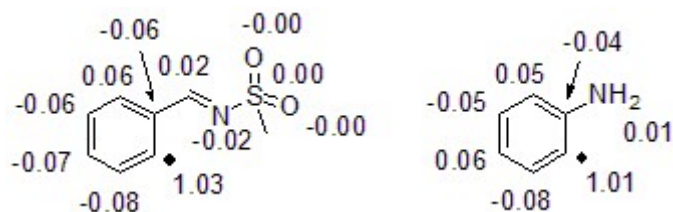

Figure S40: Mulliken spin density values for the radicals obtained from the breaking of the C-Br bonds of **2a** and **3b**.

### N-S bond cleavage

We also tested the possibility of N-S bond cleavage in complex **2a**. This is mentioned in the manuscript (the transition state lies too high in energy compared to the oxidation at the C-Br bonds), and a scheme of the transition state is shown here (Figure S41) (Cartesian coordinates are below).

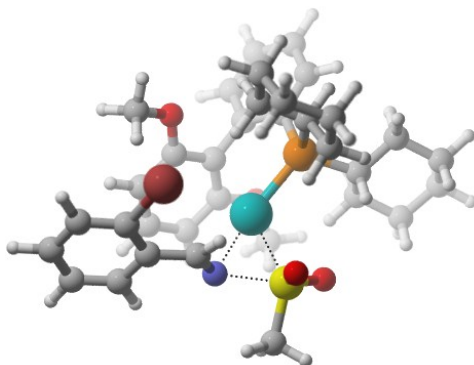

Figure S41: Representation of the transition state for N-S bond cleavage in complex **2a**.

### Energetics and Cartesian coordinates.

In the following are the ZPE corrected, and Free Gibbs energies in hartrees for each computed complexes, together with the lowest frequency.

|                                  |   |          |           |           |
|----------------------------------|---|----------|-----------|-----------|
|                                  | C | 2.605788 | -1.385428 | -1.600264 |
|                                  | C | 3.069522 | -0.579047 | -0.545193 |
|                                  | C | 3.500846 | -1.204080 | 0.634318  |
| 2a_OA_Br_Add                     | C | 3.508465 | -2.595699 | 0.753031  |
| ZPE -2555.967936                 | C | 3.071137 | -3.363767 | -0.318437 |
| Free Gibbs energy -2556.042654   | O | 2.235230 | -0.720497 | -2.718969 |
| Frequency 20.9368                | C | 3.288999 | 0.880241  | -0.752848 |
| Pd -0.011358 -0.879892 -0.113024 | O | 3.913290 | -0.366506 | 1.619314  |
| P 0.545900 1.392093 -0.302483    | H | 3.860416 | -3.077386 | 1.661472  |
| C 2.599265 -2.780999 -1.486631   | H | 3.091142 | -4.450356 | -0.238130 |

|                                |           |           |           |
|--------------------------------|-----------|-----------|-----------|
| H                              | 2.248161  | -3.405363 | -2.303545 |
| C                              | 4.603008  | 1.273024  | -1.030464 |
| C                              | 4.923726  | 2.596149  | -1.297324 |
| C                              | 3.921663  | 3.559558  | -1.291811 |
| C                              | 2.615518  | 3.185582  | -1.005505 |
| C                              | 2.276204  | 1.854987  | -0.725624 |
| H                              | 5.380588  | 0.509390  | -1.044268 |
| H                              | 5.953698  | 2.872199  | -1.517555 |
| H                              | 4.154091  | 4.600852  | -1.509424 |
| H                              | 1.842503  | 3.953385  | -1.004410 |
| C                              | 0.289478  | 2.117911  | 1.400027  |
| C                              | 1.588484  | -1.446993 | -3.738778 |
| C                              | -0.485223 | 2.439986  | -1.439225 |
| H                              | -0.133821 | 3.486629  | -1.403047 |
| C                              | 4.081696  | -0.903833 | 2.907236  |
| H                              | 4.937584  | -1.593944 | 2.955328  |
| H                              | 3.172407  | -1.430224 | 3.239754  |
| H                              | 4.271753  | -0.055851 | 3.571561  |
| H                              | 0.682089  | -1.943194 | -3.358470 |
| H                              | 2.257504  | -2.194984 | -4.189420 |
| H                              | 1.306438  | -0.715317 | -4.500136 |
| C                              | -1.946954 | 2.409220  | -0.994971 |
| C                              | -0.351892 | 1.927834  | -2.875724 |
| C                              | -1.256946 | 2.700646  | -3.830068 |
| H                              | -0.635485 | 0.859509  | -2.889446 |
| H                              | 0.696695  | 1.981306  | -3.206144 |
| C                              | -2.853552 | 3.172121  | -1.954560 |
| H                              | -2.040633 | 2.824323  | 0.021936  |
| H                              | -2.289646 | 1.361023  | -0.948413 |
| H                              | -3.896478 | 3.081188  | -1.618521 |
| C                              | -2.710650 | 2.644130  | -3.375444 |
| H                              | -2.593586 | 4.245282  | -1.933173 |
| H                              | -1.152310 | 2.301962  | -4.849389 |
| H                              | -0.927593 | 3.753620  | -3.870915 |
| H                              | -0.758764 | 1.839996  | 1.628078  |
| H                              | -3.353254 | 3.211903  | -4.062940 |
| H                              | -3.063807 | 1.599587  | -3.403045 |
| C                              | 0.433857  | 3.629227  | 1.562071  |
| C                              | 1.182014  | 1.388220  | 2.408177  |
| C                              | 0.087274  | 4.048828  | 2.989488  |
| H                              | -0.203531 | 4.168207  | 0.843448  |
| H                              | 1.476153  | 3.919076  | 1.343787  |
| C                              | 0.847216  | 1.805962  | 3.835291  |
| H                              | 2.239648  | 1.619725  | 2.190070  |
| H                              | 1.072194  | 0.297616  | 2.284476  |
| H                              | 0.195309  | 5.137173  | 3.101728  |
| C                              | 0.956105  | 3.317412  | 4.007297  |
| H                              | -0.974842 | 3.817856  | 3.183901  |
| H                              | 1.506414  | 1.287221  | 4.547619  |
| H                              | -0.182651 | 1.485661  | 4.072780  |
| H                              | 0.682352  | 3.612551  | 5.030211  |
| H                              | 2.007541  | 3.620164  | 3.863348  |
| C                              | -1.650830 | -1.794606 | 1.221466  |
| C                              | -2.781963 | -1.080754 | 0.645037  |
| C                              | -1.374782 | -1.667368 | 2.612134  |
| C                              | -0.876382 | -2.745589 | 0.478663  |
| C                              | 0.108047  | -3.522951 | 1.130828  |
| C                              | -0.392643 | -2.409796 | 3.220675  |
| C                              | 0.365650  | -3.330958 | 2.471032  |
| Br                             | -1.513364 | -3.447722 | -1.257337 |
| H                              | 0.656069  | -4.264582 | 0.554889  |
| H                              | -1.994338 | -0.972681 | 3.176856  |
| H                              | -0.207915 | -2.293933 | 4.287344  |
| H                              | 1.148267  | -3.916721 | 2.951914  |
| N                              | -3.491088 | -0.267495 | 1.356264  |
| H                              | -3.020323 | -1.283589 | -0.408936 |
| S                              | -4.842884 | 0.370490  | 0.574849  |
| O                              | -6.020567 | -0.334208 | 1.062413  |
| O                              | -4.625889 | 0.492879  | -0.867293 |
| C                              | -4.846721 | 2.000420  | 1.283888  |
| H                              | -5.728447 | 2.515500  | 0.889722  |
| H                              | -4.911484 | 1.906538  | 2.371059  |
| H                              | -3.933710 | 2.526338  | 0.989295  |
| 2a_OA_Br_TS                    |           |           |           |
| ZPE -2555.958281               |           |           |           |
| Free Gibbs energy -2556.031856 |           |           |           |
| Frequency -100.8273            |           |           |           |
| Pd                             | 0.014651  | -0.878594 | -0.767489 |
| P                              | 0.558870  | 1.334354  | -0.076342 |
| C                              | 2.901019  | -2.261551 | -2.016684 |
| C                              | 2.901953  | -0.878077 | -1.809235 |
| C                              | 3.278378  | -0.338378 | -0.568532 |
| C                              | 3.650542  | -1.213388 | 0.459487  |
| C                              | 3.661419  | -2.596537 | 0.261611  |
| C                              | 3.292055  | -3.099952 | -0.979833 |
| O                              | 2.572956  | 0.027376  | -2.761576 |
| C                              | 3.380047  | 1.134943  | -0.388132 |
| O                              | 3.997350  | -0.621799 | 1.632671  |
| H                              | 3.959399  | -3.273269 | 1.058768  |
| H                              | 3.303929  | -4.176853 | -1.145100 |
| H                              | 2.597864  | -2.682412 | -2.971340 |
| C                              | 4.669230  | 1.675565  | -0.423462 |
| C                              | 4.889345  | 3.040777  | -0.316221 |
| C                              | 3.804286  | 3.897346  | -0.174301 |
| C                              | 2.519341  | 3.372782  | -0.123410 |
| C                              | 2.278015  | 1.994663  | -0.217329 |
| H                              | 5.510219  | 0.993236  | -0.544912 |
| H                              | 5.903662  | 3.434801  | -0.351965 |
| H                              | 3.953625  | 4.973315  | -0.099614 |
| H                              | 1.685429  | 4.063616  | -0.007822 |
| C                              | 0.177330  | 1.484871  | 1.749411  |
| C                              | 1.950966  | -0.444026 | -3.935486 |
| C                              | -0.491369 | 2.626975  | -0.907092 |
| H                              | -0.215262 | 3.632570  | -0.544161 |

|    |           |           |           |                                |           |           |           |
|----|-----------|-----------|-----------|--------------------------------|-----------|-----------|-----------|
| C  | 4.005769  | -1.415161 | 2.793219  | S                              | -5.086442 | 0.166981  | 0.336379  |
| H  | 4.827591  | -2.146771 | 2.788811  | O                              | -6.318463 | -0.586911 | 0.515644  |
| H  | 3.045907  | -1.943263 | 2.919866  | O                              | -4.645090 | 0.521563  | -1.012771 |
| H  | 4.150470  | -0.727669 | 3.632333  | C                              | -5.196021 | 1.655012  | 1.303687  |
| H  | 1.036559  | -1.009953 | -3.694404 | H                              | -5.998416 | 2.260066  | 0.869885  |
| H  | 2.630114  | -1.071236 | -4.531860 | H                              | -5.434379 | 1.381794  | 2.334914  |
| H  | 1.683001  | 0.443476  | -4.514640 | H                              | -4.242654 | 2.189961  | 1.250955  |
| C  | -1.971186 | 2.400079  | -0.592970 | 2a_OA_Br_Prod                  |           |           |           |
| C  | -0.251437 | 2.568177  | -2.419596 | ZPE -2555.985878               |           |           |           |
| C  | -1.154161 | 3.540144  | -3.172194 | Free Gibbs energy -2556.061892 |           |           |           |
| H  | -0.459758 | 1.537073  | -2.759539 | Frequency 20.2006              |           |           |           |
| H  | 0.808177  | 2.762855  | -2.646915 | Pd                             | -0.261499 | -1.346304 | -0.004928 |
| C  | -2.860882 | 3.385852  | -1.343391 | P                              | -0.207857 | 0.792726  | 0.956131  |
| H  | -2.149055 | 2.479868  | 0.492383  | C                              | -3.764034 | -2.138877 | -0.612026 |
| H  | -2.257174 | 1.374755  | -0.887562 | C                              | -3.305887 | -1.206553 | 0.322267  |
| H  | -3.915872 | 3.178093  | -1.114782 | C                              | -3.298555 | 0.164627  | 0.026786  |
| C  | -2.621914 | 3.293973  | -2.844306 | C                              | -3.701958 | 0.576797  | -1.252208 |
| H  | -2.647292 | 4.413028  | -0.998448 | C                              | -4.171724 | -0.344207 | -2.190906 |
| H  | -0.977352 | 3.452224  | -4.253749 | C                              | -4.207878 | -1.691483 | -1.849460 |
| H  | -0.888006 | 4.575468  | -2.896175 | O                              | -2.833877 | -1.545533 | 1.553344  |
| H  | -0.883569 | 1.173828  | 1.816029  | C                              | -3.032033 | 1.191769  | 1.070083  |
| H  | -3.263183 | 4.006261  | -3.382109 | O                              | -3.598217 | 1.908971  | -1.492877 |
| H  | -2.914745 | 2.285621  | -3.183731 | H                              | -4.496893 | -0.020848 | -3.176413 |
| C  | 0.319094  | 2.874518  | 2.366285  | H                              | -4.567703 | -2.417095 | -2.576768 |
| C  | 0.998860  | 0.459649  | 2.535660  | H                              | -3.751055 | -3.201851 | -0.391002 |
| C  | -0.078267 | 2.861101  | 3.841011  | C                              | -4.163630 | 1.836939  | 1.584284  |
| H  | -0.285471 | 3.614363  | 1.818563  | C                              | -4.065746 | 2.820714  | 2.556178  |
| H  | 1.370120  | 3.198595  | 2.283396  | C                              | -2.813641 | 3.186780  | 3.036663  |
| C  | 0.612519  | 0.456969  | 4.010814  | C                              | -1.681737 | 2.558684  | 2.537613  |
| H  | 2.072467  | 0.698249  | 2.433938  | C                              | -1.765775 | 1.561194  | 1.553596  |
| H  | 0.857550  | -0.543583 | 2.100347  | H                              | -5.140262 | 1.545694  | 1.198815  |
| H  | 0.035304  | 3.866335  | 4.271498  | H                              | -4.965600 | 3.299118  | 2.938985  |
| C  | 0.747583  | 1.845698  | 4.622504  | H                              | -2.714956 | 3.956122  | 3.800469  |
| H  | -1.148071 | 2.602181  | 3.926630  | H                              | -0.709484 | 2.853385  | 2.929852  |
| H  | 1.226880  | -0.275077 | 4.558253  | C                              | 0.666722  | 2.122511  | 0.004493  |
| H  | -0.433681 | 0.117521  | 4.106295  | C                              | -2.953290 | -2.897473 | 1.963091  |
| H  | 0.446247  | 1.835528  | 5.679669  | C                              | 0.741178  | 0.493811  | 2.523859  |
| H  | 1.808178  | 2.150541  | 4.599931  | H                              | 0.748143  | 1.417979  | 3.127870  |
| C  | -1.897567 | -1.973692 | 1.085867  | C                              | -3.674282 | 2.339078  | -2.829999 |
| C  | -2.978879 | -1.214221 | 0.484597  | H                              | -4.679501 | 2.195892  | -3.253822 |
| C  | -1.843085 | -2.160794 | 2.477111  | H                              | -2.935653 | 1.812451  | -3.456194 |
| C  | -0.827400 | -2.474798 | 0.308715  | H                              | -3.442412 | 3.407957  | -2.821824 |
| C  | 0.209096  | -3.210191 | 0.901827  | H                              | -2.337554 | -3.560535 | 1.337071  |
| C  | -0.793865 | -2.836945 | 3.073936  | H                              | -4.002940 | -3.222553 | 1.938656  |
| C  | 0.234909  | -3.356974 | 2.279973  | H                              | -2.588918 | -2.930632 | 2.993232  |
| Br | -1.171487 | -2.991171 | -1.724252 | C                              | 2.185513  | 0.092740  | 2.230166  |
| H  | 0.998845  | -3.620316 | 0.277503  | C                              | 0.037605  | -0.604448 | 3.331775  |
| H  | -2.658432 | -1.748045 | 3.069558  | C                              | 0.804652  | -0.918281 | 4.611942  |
| H  | -0.775545 | -2.972645 | 4.153409  | H                              | -0.019394 | -1.522354 | 2.711669  |
| H  | 1.063934  | -3.896003 | 2.739440  | H                              | -1.001167 | -0.317848 | 3.553797  |
| N  | -3.863446 | -0.616498 | 1.206227  | C                              | 2.949732  | -0.207326 | 3.513206  |
| H  | -3.003678 | -1.161604 | -0.613756 | H                              | 2.703419  | 0.873689  | 1.651487  |

|                                |           |           |           |   |           |           |           |
|--------------------------------|-----------|-----------|-----------|---|-----------|-----------|-----------|
| H                              | 2.192369  | -0.810498 | 1.597515  | C | 0.035896  | -1.950406 | -2.067759 |
| H                              | 3.975269  | -0.503493 | 3.256516  | C | 1.196826  | -2.076247 | -1.290581 |
| C                              | 2.250801  | -1.299299 | 4.314287  | C | 1.260137  | -3.101512 | -0.339208 |
| H                              | 3.017066  | 0.709786  | 4.124919  | C | 0.193065  | -3.985222 | -0.155704 |
| H                              | 0.295935  | -1.721229 | 5.163790  | C | -0.938544 | -3.841438 | -0.950033 |
| H                              | 0.787286  | -0.029116 | 5.265941  | O | 0.056838  | -0.955907 | -2.986368 |
| H                              | 1.534060  | 1.593255  | -0.428076 | C | 2.367017  | -1.189059 | -1.526066 |
| H                              | 2.793932  | -1.502308 | 5.247644  | O | 2.415264  | -3.164117 | 0.374191  |
| H                              | 2.266486  | -2.235785 | 3.731211  | H | 0.249031  | -4.783910 | 0.579414  |
| C                              | 1.198102  | 3.321572  | 0.790034  | H | -1.769091 | -4.535904 | -0.825522 |
| C                              | -0.203133 | 2.600492  | -1.163539 | H | -1.937781 | -2.737044 | -2.498478 |
| C                              | 2.021749  | 4.218141  | -0.133173 | C | 3.438329  | -1.729702 | -2.244201 |
| H                              | 1.807162  | 3.000984  | 1.649669  | C | 4.566514  | -0.978206 | -2.539202 |
| H                              | 0.350134  | 3.899409  | 1.194321  | C | 4.637064  | 0.343960  | -2.116556 |
| C                              | 0.610745  | 3.500797  | -2.087847 | C | 3.583728  | 0.889530  | -1.394277 |
| H                              | -1.069061 | 3.156057  | -0.762507 | C | 2.440194  | 0.143354  | -1.077810 |
| H                              | -0.612936 | 1.745601  | -1.721494 | H | 3.368488  | -2.765970 | -2.574674 |
| H                              | 2.414807  | 5.078409  | 0.426805  | H | 5.385933  | -1.422769 | -3.102022 |
| C                              | 1.198507  | 4.685379  | -1.329226 | H | 5.510540  | 0.952100  | -2.347361 |
| H                              | 2.897147  | 3.648311  | -0.494275 | H | 3.657947  | 1.927966  | -1.074055 |
| H                              | -0.014670 | 3.844940  | -2.924728 | C | 1.810360  | 0.982734  | 1.650657  |
| H                              | 1.428854  | 2.907016  | -2.532109 | C | -1.141301 | -0.649200 | -3.660256 |
| H                              | 1.812166  | 5.306677  | -1.996381 | C | 1.037458  | 2.647190  | -0.652871 |
| H                              | 0.377394  | 5.328230  | -0.968423 | H | 2.052363  | 3.079332  | -0.604359 |
| C                              | 1.550249  | -0.413550 | -2.233469 | C | 2.457686  | -4.023900 | 1.482482  |
| C                              | 2.697101  | -0.544049 | -1.344963 | H | 2.397947  | -5.081989 | 1.184338  |
| C                              | 1.747142  | 0.098421  | -3.530622 | H | 1.644010  | -3.806711 | 2.192956  |
| C                              | 0.257780  | -0.788943 | -1.841867 | H | 3.419390  | -3.846330 | 1.973026  |
| C                              | -0.792356 | -0.726799 | -2.754386 | H | -1.937570 | -0.374418 | -2.950131 |
| C                              | 0.696748  | 0.199425  | -4.424305 | H | -1.478878 | -1.487111 | -4.289037 |
| C                              | -0.573318 | -0.230844 | -4.036139 | H | -0.916674 | 0.206600  | -4.302350 |
| Br                             | -0.057623 | -3.735539 | -0.602334 | C | 0.123522  | 3.496872  | 0.233839  |
| H                              | -1.786000 | -1.062503 | -2.467307 | C | 0.557547  | 2.696218  | -2.106543 |
| H                              | 2.758820  | 0.389298  | -3.810806 | C | 0.488511  | 4.131070  | -2.617265 |
| H                              | 0.865796  | 0.586019  | -5.427394 | H | -0.448254 | 2.240782  | -2.152073 |
| H                              | -1.407049 | -0.193173 | -4.738719 | H | 1.203988  | 2.079017  | -2.749390 |
| N                              | 3.764759  | 0.147502  | -1.540302 | C | 0.043489  | 4.932334  | -0.278783 |
| H                              | 2.603661  | -1.255739 | -0.508705 | H | 0.473710  | 3.492301  | 1.277426  |
| S                              | 5.060115  | -0.163713 | -0.493681 | H | -0.884758 | 3.044451  | 0.243831  |
| O                              | 6.182191  | -0.598339 | -1.309182 | H | -0.630210 | 5.522500  | 0.358961  |
| O                              | 4.651619  | -0.954521 | 0.666042  | C | -0.414893 | 4.981377  | -1.731722 |
| C                              | 5.374142  | 1.503395  | 0.051236  | H | 1.039880  | 5.401516  | -0.198132 |
| H                              | 6.259387  | 1.469373  | 0.693960  | H | 0.135827  | 4.146820  | -3.658605 |
| H                              | 5.562364  | 2.127243  | -0.826859 | H | 1.503898  | 4.564218  | -2.624766 |
| H                              | 4.509308  | 1.873078  | 0.613939  | H | 1.000010  | 1.472179  | 2.225311  |
| 3b_OA_Br_Add                   |           |           |           | H | -0.444891 | 6.019979  | -2.091379 |
| ZPE -1930.170859               |           |           |           | H | -1.446619 | 4.594936  | -1.796704 |
| Free Gibbs energy -1930.241902 |           |           |           | C | 3.093440  | 1.794332  | 1.821673  |
| Frequency 20.6882              |           |           |           | C | 1.986447  | -0.422899 | 2.230235  |
| Pd                             | -1.067648 | -0.009976 | 0.148672  | C | 3.501900  | 1.858535  | 3.292058  |
| P                              | 1.075141  | 0.880052  | -0.069926 | H | 2.977653  | 2.813444  | 1.419812  |
| C                              | -1.035387 | -2.834424 | -1.901601 | H | 3.903141  | 1.314581  | 1.245156  |

|                                |           |           |           |    |           |           |           |
|--------------------------------|-----------|-----------|-----------|----|-----------|-----------|-----------|
| C                              | 2.407786  | -0.364985 | 3.694971  | C  | 0.140952  | 0.752656  | -4.074029 |
| H                              | 2.747497  | -0.968315 | 1.643749  | C  | 2.172945  | 2.097313  | 0.259101  |
| H                              | 1.044478  | -0.985145 | 2.124547  | H  | 3.174870  | 1.964499  | 0.703672  |
| H                              | 4.427474  | 2.441875  | 3.403012  | C  | -0.233172 | -4.635812 | 0.559463  |
| C                              | 3.675483  | 0.462258  | 3.876916  | H  | -0.596124 | -5.493339 | -0.027754 |
| H                              | 2.722367  | 2.396450  | 3.859101  | H  | -1.091905 | -4.125470 | 1.025023  |
| H                              | 2.550920  | -1.381636 | 4.091373  | H  | 0.435918  | -5.002254 | 1.343679  |
| H                              | 1.589394  | 0.087032  | 4.282962  | H  | -0.716956 | 1.237199  | -3.581283 |
| H                              | 3.952802  | 0.520261  | 4.939376  | H  | -0.186852 | 0.288055  | -5.016270 |
| H                              | 4.510964  | -0.041492 | 3.360686  | H  | 0.902152  | 1.505786  | -4.294096 |
| C                              | -3.068371 | -0.328110 | 0.883205  | C  | 1.425353  | 3.146514  | 1.084828  |
| C                              | -3.310502 | 0.792297  | 1.731333  | C  | 2.338705  | 2.576715  | -1.185878 |
| C                              | -2.409384 | -1.482093 | 1.367133  | C  | 3.042225  | 3.927946  | -1.248177 |
| C                              | -2.844018 | 0.708400  | 3.048150  | H  | 1.332381  | 2.664092  | -1.634162 |
| N                              | -3.971176 | 1.918406  | 1.283881  | H  | 2.876850  | 1.824035  | -1.782201 |
| C                              | -1.968248 | -1.520929 | 2.700690  | C  | 2.124558  | 4.501474  | 1.016519  |
| H                              | -2.360815 | -2.373590 | 0.742170  | H  | 1.328942  | 2.825182  | 2.132942  |
| C                              | -2.196857 | -0.431201 | 3.527029  | H  | 0.395099  | 3.233281  | 0.694328  |
| H                              | -3.016380 | 1.559014  | 3.708871  | H  | 1.562898  | 5.244211  | 1.601183  |
| H                              | -1.468075 | -2.415200 | 3.068903  | C  | 2.294461  | 4.969495  | -0.423955 |
| Br                             | -4.181678 | -0.503424 | -0.751970 | H  | 3.119227  | 4.419392  | 1.488722  |
| H                              | -1.872355 | -0.457170 | 4.566193  | H  | 3.138289  | 4.256961  | -2.292935 |
| H                              | -4.409657 | 2.482349  | 1.999228  | H  | 4.069453  | 3.823817  | -0.857578 |
| H                              | -4.532175 | 1.808723  | 0.448183  | H  | 0.539366  | 0.705803  | 2.522348  |
| 3b_OA_Br_TS                    |           |           |           |    |           |           |           |
| ZPE -1930.164004               |           |           |           |    |           |           |           |
| Free Gibbs energy -1930.232652 |           |           |           |    |           |           |           |
| Frequency -101.7378            |           |           |           |    |           |           |           |
| Pd                             | -0.988025 | 0.663636  | -0.419690 | H  | 2.815444  | 5.937152  | -0.456128 |
| P                              | 1.250593  | 0.480113  | 0.269542  | H  | 1.298195  | 5.132484  | -0.869814 |
| C                              | -1.309604 | -1.466322 | -3.158866 | C  | 2.552527  | 0.001381  | 2.827464  |
| C                              | -0.010799 | -1.185628 | -2.720806 | C  | 0.565987  | -1.408437 | 2.209970  |
| C                              | 0.599762  | -1.971951 | -1.732004 | C  | 2.344770  | -0.356324 | 4.297815  |
| C                              | -0.120039 | -3.042681 | -1.186864 | H  | 3.032053  | 0.989767  | 2.746976  |
| C                              | -1.412214 | -3.342177 | -1.625880 | H  | 3.247341  | -0.727319 | 2.375877  |
| C                              | -1.985844 | -2.550187 | -2.612530 | C  | 0.372973  | -1.777270 | 3.676984  |
| O                              | 0.752786  | -0.183161 | -3.218461 | H  | 1.195798  | -2.168713 | 1.714052  |
| C                              | 2.017352  | -1.738434 | -1.343536 | H  | -0.404159 | -1.411634 | 1.687271  |
| O                              | 0.525215  | -3.747667 | -0.221370 | H  | 3.304849  | -0.327228 | 4.833244  |
| H                              | -1.965230 | -4.177329 | -1.203289 | C  | 1.689136  | -1.724250 | 4.444298  |
| H                              | -2.992446 | -2.778111 | -2.962054 | H  | 1.700625  | 0.407779  | 4.766694  |
| H                              | -1.789312 | -0.852112 | -3.915734 | H  | -0.087624 | -2.773917 | 3.759542  |
| C                              | 2.960232  | -2.623495 | -1.877081 | H  | -0.342638 | -1.068151 | 4.129552  |
| C                              | 4.315607  | -2.487713 | -1.615875 | H  | 1.530709  | -1.964363 | 5.505626  |
| C                              | 4.753510  | -1.446857 | -0.805847 | H  | 2.372778  | -2.493541 | 4.045536  |
| C                              | 3.827045  | -0.567272 | -0.261109 | C  | -2.835739 | 0.354495  | 0.601566  |
| C                              | 2.452488  | -0.692683 | -0.506933 | C  | -2.813335 | 0.893723  | 1.906623  |
| H                              | 2.604684  | -3.432097 | -2.515521 | C  | -3.147146 | -0.985451 | 0.363000  |
| H                              | 5.027661  | -3.189339 | -2.047752 | C  | -2.994646 | -0.008670 | 2.961362  |
| H                              | 5.814176  | -1.316961 | -0.595820 | N  | -2.552623 | 2.231713  | 2.157567  |
| H                              | 4.191303  | 0.242162  | 0.370109  | C  | -3.321126 | -1.854741 | 1.437320  |
| C                              | 1.226513  | -0.034276 | 2.069355  | H  | -3.217746 | -1.342150 | -0.663442 |
|                                |           |           |           | C  | -3.242278 | -1.358597 | 2.735396  |
|                                |           |           |           | H  | -2.932144 | 0.374668  | 3.981468  |
|                                |           |           |           | H  | -3.538630 | -2.905916 | 1.251564  |
|                                |           |           |           | Br | -3.329512 | 1.696300  | -0.990198 |

|                                |           |           |           |                                |           |           |           |
|--------------------------------|-----------|-----------|-----------|--------------------------------|-----------|-----------|-----------|
| H                              | -3.386319 | -2.022520 | 3.586452  | H                              | -2.522405 | 2.075414  | -4.404590 |
| H                              | -2.984478 | 2.599205  | 2.996220  | H                              | -1.580054 | 3.422860  | -3.763121 |
| H                              | -2.657913 | 2.847250  | 1.358823  | H                              | -0.252060 | 1.953090  | 1.780733  |
| 3b_OA_Br_Prod                  |           |           |           | H                              | -3.993012 | 3.759566  | -3.263698 |
| ZPE -1930.199412               |           |           |           | H                              | -4.063592 | 2.188084  | -2.456127 |
| Free Gibbs energy -1930.269185 |           |           |           | C                              | 1.093490  | 3.417727  | 0.941807  |
| Frequency 14.5622              |           |           |           | C                              | 1.757670  | 1.207055  | 1.916490  |
| Pd                             | -0.939770 | -1.002862 | -0.160726 | C                              | 1.386553  | 4.093988  | 2.279772  |
| P                              | 0.162650  | 1.055999  | -0.382570 | H                              | 0.320531  | 3.985065  | 0.402496  |
| C                              | 1.378623  | -3.498050 | -0.244025 | H                              | 2.000615  | 3.435990  | 0.312523  |
| C                              | 1.468688  | -2.259660 | -0.874948 | C                              | 2.025964  | 1.871563  | 3.262828  |
| C                              | 2.444481  | -1.319169 | -0.537847 | H                              | 2.681962  | 1.208294  | 1.313679  |
| C                              | 3.322891  | -1.637277 | 0.513885  | H                              | 1.483955  | 0.149235  | 2.053873  |
| C                              | 3.226146  | -2.856954 | 1.182254  | H                              | 1.708786  | 5.131672  | 2.112914  |
| C                              | 2.263885  | -3.780164 | 0.784613  | C                              | 2.435429  | 3.327951  | 3.076807  |
| O                              | 0.540583  | -1.845324 | -1.810663 | H                              | 0.452659  | 4.145783  | 2.864918  |
| C                              | 2.633389  | -0.073088 | -1.326376 | H                              | 2.804351  | 1.322083  | 3.812329  |
| O                              | 4.245115  | -0.688679 | 0.818002  | H                              | 1.110167  | 1.818223  | 3.877393  |
| H                              | 3.903357  | -3.099291 | 1.996470  | H                              | 2.605552  | 3.810376  | 4.049735  |
| H                              | 2.190772  | -4.733137 | 1.304888  | H                              | 3.396841  | 3.362401  | 2.535605  |
| H                              | 0.582091  | -4.190734 | -0.501830 | C                              | -1.990732 | -0.345674 | 1.414403  |
| C                              | 3.816931  | -0.003649 | -2.071326 | C                              | -3.352636 | -0.011465 | 1.322333  |
| C                              | 4.122843  | 1.091726  | -2.863376 | C                              | -1.347283 | -0.293077 | 2.646224  |
| C                              | 3.233820  | 2.156783  | -2.920183 | C                              | -3.994603 | 0.474010  | 2.469825  |
| C                              | 2.057506  | 2.105633  | -2.184862 | N                              | -4.044900 | -0.092433 | 0.108830  |
| C                              | 1.726499  | 1.005586  | -1.379602 | C                              | -2.003031 | 0.173489  | 3.787081  |
| H                              | 4.507690  | -0.844279 | -2.017387 | H                              | -0.310876 | -0.622599 | 2.725517  |
| H                              | 5.049261  | 1.110316  | -3.434763 | C                              | -3.329630 | 0.574652  | 3.685352  |
| H                              | 3.450859  | 3.029445  | -3.533717 | H                              | -5.046626 | 0.757745  | 2.397230  |
| H                              | 1.383108  | 2.956460  | -2.250053 | H                              | -1.478163 | 0.211529  | 4.740772  |
| C                              | 0.662536  | 1.965593  | 1.159761  | Br                             | -2.321097 | -3.123699 | -0.144937 |
| C                              | 0.097492  | -2.802569 | -2.771244 | H                              | -3.861904 | 0.947810  | 4.559286  |
| C                              | -0.921556 | 2.228694  | -1.326957 | H                              | -5.051147 | -0.120762 | 0.238139  |
| H                              | -0.335234 | 3.134836  | -1.555357 | H                              | -3.743854 | -0.895609 | -0.443254 |
| C                              | 4.944572  | -0.817747 | 2.031390  | cycl_CN_noMs_Add               |           |           |           |
| H                              | 5.653983  | -1.658507 | 2.009407  | ZPE -2240.314579               |           |           |           |
| H                              | 4.250365  | -0.954581 | 2.874632  | Free Gibbs energy -2240.388557 |           |           |           |
| H                              | 5.499936  | 0.114738  | 2.166319  | Frequency 10.1914              |           |           |           |
| H                              | -0.559012 | -3.553598 | -2.317225 | N                              | 3.954033  | 0.219259  | 0.759332  |
| H                              | 0.968227  | -3.275376 | -3.243462 | C                              | 3.794064  | 1.487739  | 0.205713  |
| H                              | -0.471804 | -2.234531 | -3.512511 | C                              | 3.676391  | 2.524063  | 1.153448  |
| C                              | -2.145386 | 2.681793  | -0.527567 | C                              | 3.830152  | 1.847078  | -1.163567 |
| C                              | -1.351146 | 1.589166  | -2.652026 | C                              | 3.623241  | 3.859977  | 0.797199  |
| C                              | -2.199788 | 2.556666  | -3.470490 | H                              | 3.627328  | 2.246896  | 2.208799  |
| H                              | -1.935476 | 0.678006  | -2.430989 | C                              | 3.794451  | 3.209641  | -1.490531 |
| H                              | -0.470608 | 1.263886  | -3.228542 | C                              | 3.843601  | 0.958043  | -2.364584 |
| C                              | -2.966831 | 3.669947  | -1.351776 | C                              | 3.685220  | 4.219266  | -0.545876 |
| H                              | -1.847131 | 3.135456  | 0.429986  | H                              | 3.533711  | 4.618709  | 1.573251  |
| H                              | -2.774810 | 1.812581  | -0.291012 | H                              | 3.848747  | 3.468581  | -2.549317 |
| H                              | -3.842492 | 3.996309  | -0.773497 | H                              | 3.655982  | 5.263377  | -0.851195 |
| C                              | -3.403461 | 3.044824  | -2.672085 | H                              | 4.570856  | 1.298988  | -3.129997 |
| H                              | -2.367980 | 4.576113  | -1.554292 | N                              | 3.057574  | 0.017795  | -2.688590 |

|   |           |           |           |                   |              |           |           |
|---|-----------|-----------|-----------|-------------------|--------------|-----------|-----------|
| H | 2.121330  | -3.168534 | -1.793114 | H                 | -3.275820    | -1.371251 | -3.935219 |
| C | 2.829907  | -2.856970 | -1.025259 | H                 | -4.107819    | -1.470004 | -2.375314 |
| C | 3.641308  | -3.809291 | -0.411308 | H                 | -2.539694    | -4.712089 | -1.301833 |
| H | 3.566366  | -4.856910 | -0.699231 | H                 | -3.669040    | -3.442322 | -0.816628 |
| C | 4.546861  | -3.405685 | 0.564781  | H                 | -3.734020    | -3.755934 | -3.286031 |
| H | 5.191180  | -4.132234 | 1.057284  | H                 | -1.997798    | -3.446544 | -3.386723 |
| C | 4.655212  | -2.060838 | 0.889580  | C                 | -0.220165    | -0.847965 | 1.734598  |
| H | 5.393971  | -1.733433 | 1.624536  | C                 | 0.616205     | -2.128021 | 1.861689  |
| C | 3.837137  | -1.095898 | 0.281171  | C                 | 0.471636     | 0.292980  | 2.490961  |
| C | 2.876505  | -1.519112 | -0.642453 | H                 | -1.225865    | -1.011803 | 2.165758  |
| H | 4.318083  | 0.260121  | 1.702863  | C                 | 0.882562     | -2.492580 | 3.317693  |
| H | -6.503982 | -1.315938 | 1.245510  | H                 | 1.582652     | -1.964693 | 1.363702  |
| H | -2.808049 | -0.746507 | 4.100310  | H                 | 0.149155     | -2.972814 | 1.339994  |
| H | -4.873260 | -0.857935 | 3.033962  | C                 | 0.789698     | -0.077371 | 3.936709  |
| H | -3.917960 | 0.619788  | 4.452633  | H                 | 1.416906     | 0.528396  | 1.968169  |
| C | -5.670771 | -0.642834 | 1.050603  | H                 | -0.145336    | 1.201214  | 2.461945  |
| C | -4.749405 | -0.393746 | 2.059676  | C                 | 1.606688     | -1.358214 | 4.027995  |
| C | -2.932672 | 0.347768  | 4.046365  | H                 | 1.475323     | -3.417755 | 3.358451  |
| H | -2.152371 | 0.825007  | 4.646112  | H                 | -0.070715    | -2.700710 | 3.836633  |
| H | -6.312560 | -0.232148 | -0.958307 | H                 | 1.312999     | 0.758698  | 4.424318  |
| C | -5.565204 | -0.036195 | -0.194384 | H                 | -0.152452    | -0.222421 | 4.494017  |
| C | -3.682618 | 0.471355  | 1.801367  | H                 | 1.811447     | -1.615053 | 5.077299  |
| O | -2.764573 | 0.825801  | 2.735300  | H                 | 2.586523     | -1.204033 | 3.541757  |
| H | -5.396531 | 0.309707  | -2.982657 | Pd                | 1.521084     | -0.282676 | -1.452646 |
| C | -4.483036 | 0.811661  | -0.445409 | cycl_CN_noMs_TS   |              |           |           |
| C | -3.500630 | 1.037263  | 0.531957  | ZPE               | -2240.307455 |           |           |
| P | -0.434252 | -0.356175 | -0.061505 | Free Gibbs energy | -2240.379779 |           |           |
| H | -6.254252 | 1.699408  | -2.242566 | Frequency         | -352.7666    |           |           |
| C | -5.283372 | 1.341291  | -2.616413 | N                 | 3.823986     | 0.353801  | 0.896139  |
| O | -4.284971 | 1.441143  | -1.630025 | C                 | 3.771506     | 1.608310  | 0.304041  |
| H | -4.958352 | 1.977475  | -3.443540 | C                 | 3.663678     | 2.687485  | 1.198732  |
| C | -2.324413 | 1.897662  | 0.233658  | C                 | 3.857988     | 1.899468  | -1.079658 |
| C | -1.024518 | 1.406708  | -0.023346 | C                 | 3.659609     | 4.005758  | 0.774531  |
| H | -3.563841 | 3.633471  | 0.386094  | H                 | 3.580619     | 2.465639  | 2.264484  |
| C | -2.551220 | 3.276175  | 0.198973  | C                 | 3.877725     | 3.243705  | -1.473286 |
| C | -0.009294 | 2.342190  | -0.285347 | C                 | 3.890459     | 0.943320  | -2.215962 |
| H | 1.010173  | 1.990026  | -0.468815 | C                 | 3.769911     | 4.299929  | -0.580756 |
| C | -1.531475 | 4.181862  | -0.061411 | H                 | 3.572676     | 4.802760  | 1.511676  |
| C | -0.248010 | 3.710788  | -0.301336 | H                 | 3.967689     | 3.451103  | -2.540590 |
| H | -1.742634 | 5.250020  | -0.075702 | H                 | 3.778234     | 5.328298  | -0.935019 |
| H | 0.574855  | 4.394323  | -0.504156 | H                 | 4.491279     | 1.325813  | -3.063244 |
| C | -1.836769 | -1.355436 | -0.764364 | N                 | 3.291555     | -0.161134 | -2.433811 |
| C | -2.030813 | -0.923287 | -2.223334 | H                 | 2.782385     | -2.919967 | -2.164004 |
| C | -1.600210 | -2.864394 | -0.684308 | C                 | 3.272281     | -2.652028 | -1.228446 |
| H | -2.751649 | -1.133042 | -0.195179 | C                 | 3.956288     | -3.614155 | -0.486728 |
| C | -3.158809 | -1.699976 | -2.892014 | H                 | 3.985632     | -4.646488 | -0.831674 |
| H | -1.087585 | -1.110735 | -2.770106 | C                 | 4.606396     | -3.241358 | 0.683929  |
| H | -2.222312 | 0.157763  | -2.284960 | H                 | 5.154492     | -3.975031 | 1.272317  |
| C | -2.730102 | -3.631422 | -1.367245 | C                 | 4.587281     | -1.909853 | 1.088135  |
| H | -0.635353 | -3.116671 | -1.159948 | H                 | 5.129878     | -1.602741 | 1.984988  |
| H | -1.534353 | -3.184960 | 0.364263  | C                 | 3.881587     | -0.943285 | 0.364372  |
| C | -2.909828 | -3.200058 | -2.816684 | C                 | 3.169514     | -1.340203 | -0.774248 |



|   |           |           |           |                                |           |           |           |
|---|-----------|-----------|-----------|--------------------------------|-----------|-----------|-----------|
| H | 4.026247  | 0.391734  | 1.887305  | C                              | 0.878760  | -2.872746 | 2.903633  |
| H | -6.604781 | -1.359173 | 0.807586  | H                              | 1.595516  | -2.005928 | 1.076816  |
| H | -3.014902 | -1.378065 | 3.855225  | H                              | 0.221873  | -3.066063 | 0.850376  |
| H | -5.058204 | -1.241597 | 2.722395  | C                              | 0.639090  | -0.594950 | 3.887853  |
| H | -4.124810 | -0.080857 | 4.409262  | H                              | 1.264969  | 0.372878  | 2.060120  |
| C | -5.751491 | -0.684251 | 0.765913  | H                              | -0.348744 | 0.844942  | 2.617084  |
| C | -4.878915 | -0.625872 | 1.845631  | C                              | 1.522826  | -1.831600 | 3.807272  |
| C | -3.126794 | -0.290507 | 3.996805  | H                              | 1.518356  | -3.763188 | 2.819600  |
| H | -2.367420 | 0.058068  | 4.702604  | H                              | -0.075105 | -3.205877 | 3.351659  |
| H | -6.281012 | 0.066919  | -1.179505 | H                              | 1.097753  | 0.177792  | 4.522519  |
| C | -5.571983 | 0.114277  | -0.357116 | H                              | -0.307456 | -0.878684 | 4.380065  |
| C | -3.785198 | 0.242471  | 1.784411  | H                              | 1.709758  | -2.240698 | 4.810753  |
| O | -2.902236 | 0.412269  | 2.800657  | H                              | 2.507474  | -1.559034 | 3.386641  |
| H | -5.135409 | 0.805650  | -3.035611 | Pd                             | 1.515604  | -0.302448 | -1.414757 |
| C | -4.464925 | 0.965735  | -0.409677 | cycl_CN_noMs_Prod              |           |           |           |
| C | -3.531838 | 1.003995  | 0.637057  | ZPE -2240.376643               |           |           |           |
| P | -0.480695 | -0.321199 | -0.157548 | Free Gibbs energy -2240.449343 |           |           |           |
| H | -6.095014 | 2.095512  | -2.240440 | Frequency 15.7188              |           |           |           |
| C | -5.083039 | 1.790517  | -2.546414 | N                              | 4.362553  | 0.674359  | 0.668068  |
| O | -4.194087 | 1.782718  | -1.457061 | C                              | 3.923386  | 1.832996  | 0.048948  |
| H | -4.687510 | 2.520845  | -3.256893 | C                              | 4.003115  | 3.013593  | 0.798182  |
| C | -2.331190 | 1.875566  | 0.529001  | C                              | 3.402991  | 1.897784  | -1.259382 |
| C | -1.049624 | 1.419117  | 0.152473  | C                              | 3.597790  | 4.236551  | 0.281221  |
| H | -3.525854 | 3.568607  | 1.057379  | H                              | 4.396834  | 2.962672  | 1.814670  |
| C | -2.525252 | 3.236324  | 0.780226  | C                              | 3.013481  | 3.145914  | -1.759411 |
| C | -0.021595 | 2.368568  | 0.037317  | C                              | 3.182624  | 0.753707  | -2.153817 |
| H | 0.974568  | 2.032281  | -0.262584 | C                              | 3.102315  | 4.314676  | -1.015543 |
| C | -1.489221 | 4.154901  | 0.677547  | H                              | 3.676104  | 5.129345  | 0.899304  |
| C | -0.226770 | 3.717015  | 0.300736  | H                              | 2.606480  | 3.178526  | -2.771010 |
| H | -1.673227 | 5.208424  | 0.883413  | H                              | 2.787112  | 5.265481  | -1.440292 |
| H | 0.602308  | 4.415987  | 0.200204  | H                              | 2.856760  | 1.061618  | -3.154506 |
| C | -1.897245 | -1.233725 | -0.953879 | N                              | 3.487500  | -0.525002 | -2.078081 |
| C | -2.099508 | -0.674294 | -2.366636 | H                              | 3.832523  | -2.951999 | -2.130164 |
| C | -1.659861 | -2.745016 | -1.004101 | C                              | 4.149039  | -2.581106 | -1.156542 |
| H | -2.809769 | -1.063802 | -0.364469 | C                              | 4.614445  | -3.446566 | -0.176395 |
| C | -3.221318 | -1.399330 | -3.103139 | H                              | 4.680950  | -4.514502 | -0.372197 |
| H | -1.155101 | -0.798403 | -2.928011 | C                              | 4.998365  | -2.917458 | 1.048787  |
| H | -2.304897 | 0.405841  | -2.326783 | H                              | 5.375148  | -3.559616 | 1.842956  |
| C | -2.791003 | -3.451883 | -1.746033 | C                              | 4.903423  | -1.548550 | 1.263805  |
| H | -0.694950 | -2.955167 | -1.501953 | H                              | 5.206318  | -1.137069 | 2.229092  |
| H | -1.589337 | -3.153425 | 0.013716  | C                              | 4.424447  | -0.667271 | 0.287021  |
| C | -2.966786 | -2.899897 | -3.153971 | C                              | 4.036827  | -1.197750 | -0.965488 |
| H | -3.335003 | -0.985671 | -4.116464 | H                              | 4.693511  | 0.829504  | 1.611847  |
| H | -4.175479 | -1.218125 | -2.575299 | H                              | -6.611879 | -1.497281 | 1.083310  |
| H | -2.603109 | -4.534751 | -1.771252 | H                              | -2.912370 | -1.225573 | 3.966274  |
| H | -3.730264 | -3.305967 | -1.182836 | H                              | -4.991522 | -1.214474 | 2.916668  |
| H | -3.787116 | -3.416326 | -3.672851 | H                              | -4.022736 | 0.083097  | 4.487441  |
| H | -2.051087 | -3.094111 | -3.738241 | C                              | -5.783075 | -0.801751 | 0.962209  |
| C | -0.273038 | -1.053896 | 1.561624  | C                              | -4.868535 | -0.649548 | 1.997091  |
| C | 0.628996  | -2.294169 | 1.515842  | C                              | -3.039530 | -0.133735 | 4.043847  |
| C | 0.330204  | -0.011948 | 2.511010  | H                              | -2.257272 | 0.272086  | 4.691831  |
| H | -1.276748 | -1.336887 | 1.928293  | H                              | -6.412974 | -0.198840 | -1.001370 |

|   |           |           |           |                   |              |           |           |
|---|-----------|-----------|-----------|-------------------|--------------|-----------|-----------|
| C | -5.672741 | -0.074734 | -0.216033 | H                 | -0.165611    | -0.634762 | 4.327518  |
| C | -3.805899 | 0.243383  | 1.833809  | H                 | 2.065518     | -1.637530 | 4.758918  |
| O | -2.884288 | 0.495734  | 2.797431  | H                 | 2.704614     | -0.879433 | 3.292817  |
| H | -5.338922 | 0.410924  | -2.943959 | Pd                | 1.406610     | -0.482482 | -1.455287 |
| C | -4.594647 | 0.801539  | -0.371828 | CN_noMs_Add       |              |           |           |
| C | -3.624173 | 0.938802  | 0.631335  | ZPE               | -2240.314402 |           |           |
| P | -0.540961 | -0.307533 | -0.216793 | Free Gibbs energy | -2240.387505 |           |           |
| H | -6.325476 | 1.728916  | -2.233304 | Frequency         | 18.1369      |           |           |
| C | -5.310803 | 1.435470  | -2.542179 | N                 | 3.892226     | 0.257656  | 0.788794  |
| O | -4.392995 | 1.551703  | -1.482963 | C                 | 3.756114     | 1.512172  | 0.197651  |
| H | -4.961980 | 2.116937  | -3.322198 | C                 | 3.624515     | 2.573842  | 1.115142  |
| C | -2.462059 | 1.845272  | 0.423862  | C                 | 3.819940     | 1.834581  | -1.179938 |
| C | -1.179460 | 1.420423  | 0.015297  | C                 | 3.581547     | 3.899696  | 0.722923  |
| H | -3.697400 | 3.516100  | 0.930143  | H                 | 3.554854     | 2.325011  | 2.176471  |
| C | -2.696235 | 3.208391  | 0.627381  | C                 | 3.794528     | 3.188506  | -1.542776 |
| C | -0.193107 | 2.399175  | -0.177895 | C                 | 3.850992     | 0.919921  | -2.362134 |
| H | 0.799161  | 2.085941  | -0.510327 | C                 | 3.669477     | 4.223171  | -0.627883 |
| C | -1.698239 | 4.157542  | 0.452913  | H                 | 3.479775     | 4.678429  | 1.477354  |
| C | -0.435546 | 3.748174  | 0.045731  | H                 | 3.870094     | 3.419487  | -2.606703 |
| H | -1.911921 | 5.211134  | 0.627802  | H                 | 3.648150     | 5.258794  | -0.961353 |
| H | 0.367241  | 4.468540  | -0.108874 | H                 | 4.591459     | 1.245324  | -3.121535 |
| C | -1.958617 | -1.373732 | -0.783775 | N                 | 3.068111     | -0.023707 | -2.683815 |
| C | -2.316552 | -1.002449 | -2.226084 | H                 | 2.170043     | -3.186115 | -1.763608 |
| C | -1.617667 | -2.861943 | -0.687695 | C                 | 2.852186     | -2.856902 | -0.979333 |
| H | -2.827536 | -1.190923 | -0.134799 | C                 | 3.651692     | -3.792167 | -0.324914 |
| C | -3.451752 | -1.869673 | -2.762642 | H                 | 3.596376     | -4.844464 | -0.599840 |
| H | -1.417387 | -1.141378 | -2.852710 | C                 | 4.518735     | -3.366084 | 0.676502  |
| H | -2.581325 | 0.063465  | -2.293601 | H                 | 5.151086     | -4.079337 | 1.202717  |
| C | -2.765649 | -3.716387 | -1.219013 | C                 | 4.604578     | -2.015317 | 0.983946  |
| H | -0.699364 | -3.069872 | -1.267742 | H                 | 5.315682     | -1.669964 | 1.737884  |
| H | -1.405393 | -3.139368 | 0.354973  | C                 | 3.800109     | -1.067132 | 0.332492  |
| C | -3.111959 | -3.350952 | -2.656407 | C                 | 2.872358     | -1.513596 | -0.613520 |
| H | -3.675346 | -1.596446 | -3.805111 | H                 | 4.226134     | 0.319907  | 1.742588  |
| H | -4.367074 | -1.670177 | -2.176165 | H                 | -6.470327    | -1.309526 | 1.421671  |
| H | -2.509575 | -4.782744 | -1.139464 | H                 | -2.691589    | -0.682025 | 4.145468  |
| H | -3.653679 | -3.555594 | -0.581840 | H                 | -4.789531    | -0.811473 | 3.153022  |
| H | -3.945663 | -3.968026 | -3.021297 | H                 | -3.790161    | 0.687695  | 4.517919  |
| H | -2.247261 | -3.573024 | -3.304936 | C                 | -5.643919    | -0.640121 | 1.188786  |
| C | -0.158617 | -0.890685 | 1.537715  | C                 | -4.694337    | -0.368655 | 2.165596  |
| C | 0.917769  | -1.986924 | 1.502997  | C                 | -2.818855    | 0.411442  | 4.081842  |
| C | 0.313857  | 0.265204  | 2.425517  | H                 | -2.018638    | 0.896604  | 4.648104  |
| H | -1.093068 | -1.302936 | 1.965213  | H                 | -6.343292    | -0.270559 | -0.810211 |
| C | 1.307975  | -2.465417 | 2.896917  | C                 | -5.575344    | -0.059050 | -0.071003 |
| H | 1.815771  | -1.575892 | 1.006774  | C                 | -3.637917    | 0.493329  | 1.859308  |
| H | 0.602744  | -2.838159 | 0.883296  | O                 | -2.696840    | 0.872713  | 2.759741  |
| C | 0.720355  | -0.219080 | 3.814557  | H                 | -5.495028    | 0.235064  | -2.865355 |
| H | 1.182347  | 0.752680  | 1.944344  | C                 | -4.502341    | 0.784983  | -0.369903 |
| H | -0.470900 | 1.028468  | 2.509255  | C                 | -3.493069    | 1.032589  | 0.573640  |
| C | 1.790070  | -1.299993 | 3.749135  | P                 | -0.447987    | -0.365211 | -0.079150 |
| H | 2.088106  | -3.236150 | 2.812890  | H                 | -6.326335    | 1.642767  | -2.129385 |
| H | 0.440648  | -2.942251 | 3.387611  | C                 | -5.368163    | 1.273816  | -2.524920 |
| H | 1.059518  | 0.633400  | 4.421498  | O                 | -4.339921    | 1.391177  | -1.572218 |

|                   |              |           |           |   |           |           |           |
|-------------------|--------------|-----------|-----------|---|-----------|-----------|-----------|
| H                 | -5.067117    | 1.890771  | -3.375416 | C | 3.844144  | -2.172072 | -2.285750 |
| C                 | -2.328969    | 1.891651  | 0.228851  | C | 4.151875  | -1.787091 | 0.090712  |
| C                 | -1.034239    | 1.399079  | -0.049278 | C | 4.192816  | -3.505403 | -2.139731 |
| H                 | -3.569071    | 3.626787  | 0.382042  | H | 3.579112  | -1.776310 | -3.268727 |
| C                 | -2.559945    | 3.268844  | 0.177963  | C | 4.520740  | -3.129993 | 0.203654  |
| C                 | -0.027027    | 2.332114  | -0.347156 | C | 4.115808  | -1.039444 | 1.414637  |
| H                 | 0.988854     | 1.978988  | -0.547729 | C | 4.538795  | -3.993813 | -0.883401 |
| C                 | -1.547826    | 4.172303  | -0.117922 | H | 4.198685  | -4.159182 | -3.010515 |
| C                 | -0.268651    | 3.700048  | -0.377810 | H | 4.778303  | -3.501636 | 1.196504  |
| H                 | -1.761416    | 5.239778  | -0.143341 | H | 4.811887  | -5.038641 | -0.749338 |
| H                 | 0.548996     | 4.381741  | -0.606849 | H | 5.147429  | -0.874977 | 1.805110  |
| C                 | -1.854117    | -1.360669 | -0.783282 | N | 3.136170  | -1.132841 | 2.296510  |
| C                 | -2.059153    | -0.901847 | -2.233153 | H | 3.391949  | 1.408457  | 2.899707  |
| C                 | -1.602716    | -2.869052 | -0.733201 | C | 3.508889  | 1.700854  | 1.856775  |
| H                 | -2.766880    | -1.155459 | -0.203285 | C | 3.854464  | 2.998845  | 1.503567  |
| C                 | -3.173810    | -1.682250 | -2.919458 | H | 3.989792  | 3.757806  | 2.271958  |
| H                 | -1.113684    | -1.063051 | -2.784708 | C | 4.048416  | 3.312986  | 0.157205  |
| H                 | -2.269461    | 0.176711  | -2.270862 | H | 4.329327  | 4.324097  | -0.134995 |
| C                 | -2.721664    | -3.636190 | -1.433531 | C | 3.932461  | 2.330774  | -0.817208 |
| H                 | -0.633207    | -3.101698 | -1.209993 | H | 4.133231  | 2.565399  | -1.864908 |
| H                 | -1.536351    | -3.210068 | 0.308594  | C | 3.570780  | 1.022621  | -0.469573 |
| C                 | -2.902397    | -3.179493 | -2.874764 | C | 3.290726  | 0.723216  | 0.875625  |
| H                 | -3.294228    | -1.332970 | -3.955553 | H | 3.659294  | 0.341392  | -2.385985 |
| H                 | -4.127873    | -1.478352 | -2.401220 | H | -6.764800 | 0.649089  | 0.548018  |
| H                 | -2.518520    | -4.715506 | -1.387465 | H | -3.739069 | 3.362820  | -1.777392 |
| H                 | -3.664532    | -3.468087 | -0.882795 | H | -5.508412 | 2.139708  | -0.959860 |
| H                 | -3.716562    | -3.737831 | -3.358475 | H | -4.732788 | 2.580801  | -3.050297 |
| H                 | -1.984597    | -3.400550 | -3.445941 | C | -5.850488 | 0.289370  | 0.078944  |
| C                 | -0.219899    | -0.845451 | 1.719363  | C | -5.142605 | 1.135382  | -0.765592 |
| C                 | 0.576202     | -2.151198 | 1.845056  | C | -3.721820 | 2.656082  | -2.623016 |
| C                 | 0.519788     | 0.294126  | 2.433678  | H | -3.035726 | 3.030993  | -3.387894 |
| H                 | -1.221089    | -0.973104 | 2.170678  | H | -6.011384 | -1.661082 | 0.969284  |
| C                 | 0.920705     | -2.483135 | 3.292205  | C | -5.428473 | -1.011754 | 0.321740  |
| H                 | 1.516360     | -2.047135 | 1.286644  | C | -3.969871 | 0.666393  | -1.363902 |
| H                 | 0.043243     | -2.991328 | 1.383401  | O | -3.231062 | 1.397138  | -2.236743 |
| C                 | 0.918347     | -0.059643 | 3.863308  | H | -4.597697 | -3.281531 | 1.716172  |
| H                 | 1.438503     | 0.519975  | 1.862602  | C | -4.246668 | -1.461938 | -0.273252 |
| H                 | -0.093426    | 1.205599  | 2.426888  | C | -3.478357 | -0.615087 | -1.087409 |
| C                 | 1.719644     | -1.351813 | 3.921969  | P | -0.453150 | 0.291742  | 0.254499  |
| H                 | 1.489223     | -3.423846 | 3.321342  | H | -5.485673 | -3.798683 | 0.246440  |
| H                 | -0.002846    | -2.648711 | 3.876347  | C | -4.487734 | -3.623377 | 0.675763  |
| H                 | 1.483963     | 0.776430  | 4.301839  | O | -3.748192 | -2.710072 | -0.096957 |
| H                 | 0.013043     | -0.181028 | 4.483450  | H | -3.921355 | -4.557918 | 0.665413  |
| H                 | 1.996910     | -1.592120 | 4.958409  | C | -2.202129 | -1.110610 | -1.670803 |
| H                 | 2.661914     | -1.228335 | 3.357351  | C | -0.922004 | -0.835309 | -1.142290 |
| Pd                | 1.514566     | -0.308967 | -1.466195 | H | -3.310931 | -2.159253 | -3.169428 |
| CN_noMs_TS        |              |           |           | C | -2.313470 | -1.951263 | -2.781739 |
| ZPE               | -2240.268948 |           |           | C | 0.186105  | -1.448258 | -1.746252 |
| Free Gibbs energy | -2240.342988 |           |           | H | 1.176316  | -1.274836 | -1.321721 |
| Frequency         | -457.9024    |           |           | C | -1.200434 | -2.526260 | -3.380599 |
| N                 | 3.494215     | 0.034500  | -1.435092 | C | 0.059327  | -2.278956 | -2.852536 |
| C                 | 3.826437     | -1.303804 | -1.186723 | H | -1.322599 | -3.177824 | -4.244584 |

|                                |           |           |           |   |           |           |           |
|--------------------------------|-----------|-----------|-----------|---|-----------|-----------|-----------|
| H                              | 0.947365  | -2.741675 | -3.282000 | H | 5.366534  | -0.910826 | 1.960973  |
| C                              | -1.810826 | 0.159528  | 1.524572  | N | 3.295983  | -0.474135 | 2.004034  |
| C                              | -1.743254 | -1.242986 | 2.140020  | H | 5.023535  | 1.539583  | 2.578687  |
| C                              | -1.712244 | 1.225461  | 2.618394  | C | 4.693424  | 1.732973  | 1.559593  |
| H                              | -2.783687 | 0.289443  | 1.027903  | C | 4.546704  | 3.022189  | 1.083090  |
| C                              | -2.821748 | -1.438576 | 3.199437  | H | 4.782708  | 3.874472  | 1.715591  |
| H                              | -0.747789 | -1.376466 | 2.607889  | C | 4.080756  | 3.215562  | -0.223652 |
| H                              | -1.826246 | -2.012063 | 1.358372  | H | 3.955646  | 4.226359  | -0.611702 |
| C                              | -2.792480 | 1.016630  | 3.677141  | C | 3.780939  | 2.141788  | -1.042983 |
| H                              | -0.713871 | 1.185103  | 3.091194  | H | 3.441033  | 2.302686  | -2.067652 |
| H                              | -1.821035 | 2.230231  | 2.185323  | C | 3.918302  | 0.827274  | -0.567707 |
| C                              | -2.718217 | -0.377272 | 4.287139  | C | 4.393046  | 0.623291  | 0.754003  |
| H                              | -2.751238 | -2.448723 | 3.629486  | H | 3.351421  | -0.059747 | -2.330665 |
| H                              | -3.813647 | -1.361619 | 2.717401  | H | -6.917531 | 0.588904  | 0.449333  |
| H                              | -2.705967 | 1.787611  | 4.456147  | H | -3.911137 | 3.183959  | -1.995919 |
| H                              | -3.782553 | 1.152072  | 3.206263  | H | -5.674984 | 1.991224  | -1.149325 |
| H                              | -3.507929 | -0.512090 | 5.040094  | H | -4.861846 | 2.326528  | -3.251629 |
| H                              | -1.755898 | -0.492724 | 4.814450  | C | -5.989375 | 0.215817  | 0.019379  |
| C                              | -0.582294 | 2.025942  | -0.449121 | C | -5.288602 | 1.013137  | -0.876680 |
| C                              | 0.267159  | 2.979890  | 0.399424  | C | -3.862506 | 2.436914  | -2.804472 |
| C                              | -0.114069 | 2.086184  | -1.906869 | H | -3.162608 | 2.783848  | -3.570273 |
| H                              | -1.647832 | 2.324606  | -0.407810 | H | -6.125083 | -1.667439 | 1.045641  |
| C                              | 0.233569  | 4.407694  | -0.132925 | C | -5.544957 | -1.055029 | 0.360763  |
| H                              | 1.306934  | 2.619199  | 0.379731  | C | -4.097768 | 0.528015  | -1.424507 |
| H                              | -0.034221 | 2.959397  | 1.455461  | O | -3.365285 | 1.206391  | -2.343874 |
| C                              | -0.122609 | 3.517250  | -2.440035 | H | -4.640685 | -3.184016 | 1.944580  |
| H                              | 0.914712  | 1.685263  | -1.966855 | C | -4.345685 | -1.521424 | -0.185290 |
| H                              | -0.745444 | 1.447857  | -2.539479 | C | -3.582223 | -0.717126 | -1.045425 |
| C                              | 0.710571  | 4.455536  | -1.577992 | P | -0.595376 | 0.260726  | 0.346946  |
| H                              | 0.857887  | 5.052676  | 0.503256  | H | -5.544397 | -3.825850 | 0.534236  |
| H                              | -0.795644 | 4.804645  | -0.072832 | C | -4.542481 | -3.604951 | 0.932124  |
| H                              | 0.227272  | 3.528552  | -3.482850 | O | -3.827425 | -2.745087 | 0.079453  |
| H                              | -1.162210 | 3.888604  | -2.455877 | H | -3.963595 | -4.530436 | 0.984266  |
| H                              | 0.668234  | 5.481582  | -1.971392 | C | -2.286541 | -1.226757 | -1.572220 |
| H                              | 1.768244  | 4.142464  | -1.613739 | C | -1.027132 | -0.942782 | -1.001706 |
| Pd                             | 1.576751  | -0.431764 | 1.323063  | H | -3.345219 | -2.301657 | -3.088693 |
| CN_noMs_Prod                   |           |           |           | C | -2.361804 | -2.092335 | -2.667089 |
| ZPE -2240.296012               |           |           |           | C | 0.098485  | -1.585114 | -1.540793 |
| Free Gibbs energy -2240.370497 |           |           |           | H | 1.069453  | -1.413108 | -1.065803 |
| Frequency 20.1558              |           |           |           | C | -1.230803 | -2.689943 | -3.206495 |
| N                              | 3.722364  | -0.241592 | -1.407097 | C | 0.007893  | -2.443772 | -2.629224 |
| C                              | 3.990674  | -1.558581 | -1.053363 | H | -1.322703 | -3.360899 | -4.059433 |
| C                              | 3.851873  | -2.577020 | -1.997875 | H | 0.904757  | -2.933473 | -3.007732 |
| C                              | 4.437484  | -1.851280 | 0.242741  | C | -1.996410 | 0.248785  | 1.570984  |
| C                              | 4.159541  | -3.887998 | -1.657683 | C | -1.983070 | -1.083420 | 2.327706  |
| H                              | 3.515092  | -2.329448 | -3.006502 | C | -1.904779 | 1.417218  | 2.553637  |
| C                              | 4.767158  | -3.166096 | 0.551737  | H | -2.947296 | 0.346550  | 1.026019  |
| C                              | 4.479706  | -0.787152 | 1.308238  | C | -3.098117 | -1.144607 | 3.367547  |
| C                              | 4.626660  | -4.188811 | -0.381264 | H | -1.004266 | -1.188602 | 2.828252  |
| H                              | 4.043464  | -4.675395 | -2.400629 | H | -2.063391 | -1.924412 | 1.622964  |
| H                              | 5.123344  | -3.387705 | 1.558851  | C | -3.025713 | 1.346840  | 3.587534  |
| H                              | 4.874692  | -5.213848 | -0.113322 | H | -0.925235 | 1.392356  | 3.064649  |

|                                |           |           |           |    |           |           |           |
|--------------------------------|-----------|-----------|-----------|----|-----------|-----------|-----------|
| H                              | -1.963759 | 2.375266  | 2.017152  | H  | -5.731660 | -0.472932 | 2.787080  |
| C                              | -3.005344 | 0.023300  | 4.341097  | C  | -3.796601 | -0.123833 | 1.881475  |
| H                              | -3.060524 | -2.104022 | 3.905289  | C  | -2.839356 | 0.829514  | 1.442816  |
| H                              | -4.076247 | -1.103123 | 2.853803  | H  | -4.183320 | -1.983234 | 2.518429  |
| H                              | -2.946896 | 2.192595  | 4.285846  | Pd | -1.585383 | 0.040061  | -0.102152 |
| H                              | -3.995872 | 1.453064  | 3.069829  | S  | -3.829835 | 0.087295  | -2.411575 |
| H                              | -3.823080 | -0.016126 | 5.075133  | O  | -4.954985 | -0.590326 | -3.063872 |
| H                              | -2.064105 | -0.054086 | 4.911454  | O  | -2.679536 | 0.431303  | -3.260504 |
| C                              | -0.693769 | 1.947657  | -0.482655 | C  | -4.450945 | 1.584932  | -1.673303 |
| C                              | 0.199422  | 2.933327  | 0.286847  | H  | -4.877071 | 2.185581  | -2.483628 |
| C                              | -0.245428 | 1.900349  | -1.945956 | H  | -5.213131 | 1.317609  | -0.934276 |
| H                              | -1.744183 | 2.297092  | -0.450061 | H  | -3.630065 | 2.106148  | -1.170885 |
| C                              | 0.189788  | 4.324077  | -0.337773 | H  | 6.720673  | -0.175475 | -1.977679 |
| H                              | 1.232748  | 2.537817  | 0.281573  | H  | 4.235630  | 3.683988  | -0.985466 |
| H                              | -0.087515 | 2.992913  | 1.345112  | H  | 5.847908  | 2.037766  | -1.335376 |
| C                              | -0.255217 | 3.291788  | -2.573492 | H  | 5.604931  | 3.680596  | 0.176222  |
| H                              | 0.781968  | 1.491652  | -1.987480 | C  | 5.980936  | -0.100831 | -1.181623 |
| H                              | -0.883710 | 1.218819  | -2.523782 | C  | 5.488772  | 1.148289  | -0.825275 |
| C                              | 0.614660  | 4.273141  | -1.799155 | C  | 4.510907  | 3.598555  | 0.078802  |
| H                              | 0.849981  | 4.992284  | 0.235003  | H  | 4.039512  | 4.415062  | 0.633244  |
| H                              | -0.826480 | 4.751308  | -0.269040 | H  | 5.978560  | -2.219421 | -0.812081 |
| H                              | 0.062564  | 3.233885  | -3.625259 | C  | 5.564865  | -1.254815 | -0.530031 |
| H                              | -1.291778 | 3.672297  | -2.580857 | C  | 4.530911  | 1.234518  | 0.190349  |
| H                              | 0.571435  | 5.272895  | -2.255168 | O  | 4.027921  | 2.410511  | 0.644814  |
| H                              | 1.666885  | 3.944239  | -1.853878 | H  | 4.339176  | -3.749290 | -0.217210 |
| Pd                             | 1.545391  | -0.074458 | 1.211431  | C  | 4.596891  | -1.152457 | 0.472971  |
|                                |           |           |           |    |           |           |           |
| Ms_bound_N_Add                 |           |           |           |    |           |           |           |
| ZPE -2828.704438               |           |           |           |    |           |           |           |
| Free Gibbs energy -2828.782268 |           |           |           |    |           |           |           |
| Frequency 22.5813              |           |           |           |    |           |           |           |
| N                              | -3.653820 | -1.534455 | 1.781465  | H  | 4.061223  | -4.193561 | 1.490057  |
| C                              | -2.693026 | -2.438493 | 1.287070  | C  | 2.939823  | 0.150108  | 1.825916  |
| C                              | -2.288759 | -3.413513 | 2.220464  | C  | 1.560383  | 0.209603  | 1.523715  |
| C                              | -2.219618 | -2.598622 | -0.056908 | H  | 4.423353  | 0.044683  | 3.365496  |
| C                              | -1.497222 | -4.504941 | 1.899634  | C  | 3.353073  | 0.098504  | 3.160306  |
| H                              | -2.621350 | -3.283742 | 3.252284  | C  | 0.657563  | 0.184881  | 2.598200  |
| C                              | -1.430515 | -3.724524 | -0.352880 | H  | -0.412679 | 0.215399  | 2.366845  |
| C                              | -2.440737 | -1.663724 | -1.157376 | C  | 2.441572  | 0.102483  | 4.207423  |
| C                              | -1.061323 | -4.669890 | 0.587271  | C  | 1.083521  | 0.138367  | 3.920707  |
| H                              | -1.218980 | -5.217438 | 2.675935  | H  | 2.793695  | 0.067071  | 5.238375  |
| H                              | -1.102067 | -3.842765 | -1.388359 | H  | 0.345538  | 0.126782  | 4.721970  |
| H                              | -0.447068 | -5.522563 | 0.299123  | C  | 1.757961  | -0.570273 | -1.336381 |
| H                              | -2.032115 | -1.927849 | -2.139460 | C  | 1.572836  | -2.047262 | -0.982641 |
| N                              | -3.426067 | -0.741570 | -1.025313 | C  | 1.341966  | -0.303674 | -2.784540 |
| H                              | -2.451285 | 2.942088  | 1.398875  | H  | 2.817710  | -0.293122 | -1.241927 |
| C                              | -3.154491 | 2.165451  | 1.725208  | C  | 2.244879  | -2.989452 | -1.974044 |
| C                              | -4.315303 | 2.580181  | 2.385036  | H  | 0.490911  | -2.252291 | -0.968269 |
| H                              | -4.492591 | 3.638093  | 2.589672  | H  | 1.928065  | -2.244471 | 0.040485  |
| C                              | -5.244658 | 1.621217  | 2.767691  | C  | 2.053935  | -1.247400 | -3.749964 |
| H                              | -6.172290 | 1.906447  | 3.266432  | H  | 0.247462  | -0.415321 | -2.886857 |
| C                              | -4.986574 | 0.279042  | 2.509246  | H  | 1.579068  | 0.735028  | -3.059028 |

|                   |              |           |           |    |           |           |           |
|-------------------|--------------|-----------|-----------|----|-----------|-----------|-----------|
| C                 | 1.787305     | -2.704739 | -3.398775 | H  | 2.311210  | 2.240618  | 2.651673  |
| H                 | 2.033191     | -4.035100 | -1.694420 | Pd | 1.441954  | -0.684579 | -0.621482 |
| H                 | 3.342826     | -2.859886 | -1.926856 | S  | 4.818474  | -0.767586 | -1.123777 |
| H                 | 1.742769     | -1.032942 | -4.783150 | O  | 5.315976  | -0.140950 | -2.346640 |
| H                 | 3.143349     | -1.062196 | -3.699445 | O  | 4.583544  | -2.210297 | -1.130023 |
| H                 | 2.286962     | -3.377579 | -4.112574 | C  | 6.019673  | -0.422242 | 0.159270  |
| H                 | 0.704205     | -2.903131 | -3.479803 | H  | 6.969186  | -0.884206 | -0.130867 |
| C                 | 1.001218     | 2.209365  | -0.562144 | H  | 6.123407  | 0.665627  | 0.227990  |
| C                 | -0.005219    | 2.648597  | -1.633961 | H  | 5.655049  | -0.838860 | 1.104902  |
| C                 | 0.843700     | 3.091739  | 0.681540  | H  | -6.474026 | 2.061389  | -1.121086 |
| H                 | 2.032536     | 2.312603  | -0.953046 | H  | -5.348273 | -2.480046 | -1.070367 |
| C                 | 0.119837     | 4.130791  | -1.965881 | H  | -6.343642 | -0.391260 | -0.906246 |
| H                 | -1.019600    | 2.441026  | -1.247905 | H  | -6.467332 | -2.278883 | 0.316975  |
| H                 | 0.082599     | 2.042780  | -2.543806 | C  | -5.708485 | 1.619392  | -0.484606 |
| C                 | 0.913113     | 4.582050  | 0.355528  | C  | -5.636647 | 0.235832  | -0.369803 |
| H                 | -0.135692    | 2.869336  | 1.142074  | C  | -5.431281 | -2.516922 | 0.028386  |
| H                 | 1.606725     | 2.836242  | 1.429842  | H  | -5.187349 | -3.527386 | 0.369862  |
| C                 | -0.087973    | 4.980606  | -0.720371 | H  | -4.920369 | 3.529274  | 0.114630  |
| H                 | -0.603815    | 4.400643  | -2.749021 | C  | -4.836060 | 2.449490  | 0.206436  |
| H                 | 1.124948     | 4.335996  | -2.380306 | C  | -4.643039 | -0.323581 | 0.438740  |
| H                 | 0.755471     | 5.169933  | 1.272586  | O  | -4.511020 | -1.660149 | 0.646717  |
| H                 | 1.926066     | 4.833628  | -0.007131 | H  | -2.694567 | 4.231224  | 0.472557  |
| H                 | 0.000097     | 6.053199  | -0.953257 | C  | -3.842125 | 1.874014  | 1.003590  |
| H                 | -1.112515    | 4.820199  | -0.342914 | C  | -3.701891 | 0.480726  | 1.091626  |
| Ms_bound_N_TS     |              |           |           | P  | -0.817431 | -0.759459 | -0.402422 |
| ZPE               | -2828.651330 |           |           | H  | -3.797095 | 4.491065  | 1.869007  |
| Free Gibbs energy | -2828.729423 |           |           | C  | -2.880656 | 3.983412  | 1.527927  |
| Frequency         | -431.2989    |           |           | O  | -2.952943 | 2.593704  | 1.727936  |
| N                 | 2.428102     | 1.739252  | 1.779906  | H  | -2.030911 | 4.329052  | 2.122903  |
| C                 | 2.229501     | 2.601477  | 0.692517  | C  | -2.599369 | -0.100461 | 1.904128  |
| C                 | 1.653793     | 3.834001  | 1.045669  | C  | -1.376778 | -0.574314 | 1.378862  |
| C                 | 2.544323     | 2.348632  | -0.685630 | H  | -3.754042 | 0.275482  | 3.666066  |
| C                 | 1.342863     | 4.827980  | 0.132216  | C  | -2.806605 | -0.110721 | 3.287005  |
| H                 | 1.420138     | 3.996218  | 2.102656  | C  | -0.411533 | -1.022372 | 2.293229  |
| C                 | 2.199978     | 3.397278  | -1.595453 | H  | 0.550980  | -1.358517 | 1.902991  |
| C                 | 3.048999     | 1.165291  | -1.259268 | C  | -1.842261 | -0.578424 | 4.168939  |
| C                 | 1.628480     | 4.590385  | -1.221933 | C  | -0.631386 | -1.034138 | 3.665119  |
| H                 | 0.893142     | 5.762867  | 0.465007  | H  | -2.034463 | -0.571780 | 5.241834  |
| H                 | 2.413505     | 3.211475  | -2.650579 | H  | 0.157910  | -1.385405 | 4.328807  |
| H                 | 1.401146     | 5.342040  | -1.979645 | C  | -1.675721 | 0.601808  | -1.362784 |
| H                 | 3.015377     | 1.078024  | -2.346603 | C  | -1.065364 | 1.939052  | -0.933542 |
| N                 | 3.491009     | 0.047078  | -0.548637 | C  | -1.500784 | 0.404495  | -2.870321 |
| H                 | 3.323029     | -2.695480 | 0.770408  | H  | -2.756415 | 0.594891  | -1.150603 |
| C                 | 3.290291     | -1.889599 | 1.498391  | C  | -1.624337 | 3.114365  | -1.727153 |
| C                 | 3.647051     | -2.142590 | 2.817700  | H  | 0.023802  | 1.895538  | -1.100134 |
| H                 | 3.919693     | -3.155308 | 3.116632  | H  | -1.192460 | 2.097765  | 0.147761  |
| C                 | 3.623832     | -1.104473 | 3.751494  | C  | -2.059663 | 1.588043  | -3.655874 |
| H                 | 3.915782     | -1.271894 | 4.788089  | H  | -0.424332 | 0.284741  | -3.093846 |
| C                 | 3.246315     | 0.162108  | 3.334245  | H  | -2.002383 | -0.518986 | -3.198539 |
| H                 | 3.269604     | 0.989782  | 4.049325  | C  | -1.416425 | 2.898081  | -3.219504 |
| C                 | 2.841164     | 0.438056  | 2.014275  | H  | -1.126866 | 4.040575  | -1.397708 |
| C                 | 2.820485     | -0.629401 | 1.070572  | H  | -2.707642 | 3.225057  | -1.528774 |

|                                |           |           |           |   |           |           |           |
|--------------------------------|-----------|-----------|-----------|---|-----------|-----------|-----------|
| H                              | -1.917521 | 1.422034  | -4.734914 | O | 6.092239  | -1.487190 | -1.089595 |
| H                              | -3.150685 | 1.650173  | -3.485082 | O | 6.199559  | -1.555860 | 1.431889  |
| H                              | -1.821432 | 3.741162  | -3.800421 | C | 6.183242  | 0.768441  | 0.235709  |
| H                              | -0.331297 | 2.860790  | -3.420634 | H | 7.278132  | 0.788377  | 0.250641  |
| C                              | -1.683247 | -2.336186 | -0.965049 | H | 5.795887  | 1.265801  | -0.659829 |
| C                              | -0.907765 | -2.935713 | -2.145297 | H | 5.777278  | 1.233172  | 1.140111  |
| C                              | -1.776653 | -3.369539 | 0.159973  | H | -6.434154 | 2.886448  | -0.691148 |
| H                              | -2.709232 | -2.073188 | -1.291190 | H | -5.884321 | -1.715687 | -1.468747 |
| C                              | -1.524416 | -4.242606 | -2.631981 | H | -6.579949 | 0.439837  | -0.959442 |
| H                              | 0.130478  | -3.113430 | -1.812410 | H | -6.994330 | -1.567251 | -0.064913 |
| H                              | -0.831912 | -2.219130 | -2.973857 | C | -5.743727 | 2.244251  | -0.145908 |
| C                              | -2.370662 | -4.689584 | -0.324774 | C | -5.825312 | 0.867085  | -0.304910 |
| H                              | -0.760359 | -3.550923 | 0.554560  | C | -5.998714 | -1.909110 | -0.388959 |
| H                              | -2.372519 | -2.973122 | 0.993414  | H | -5.913073 | -2.985128 | -0.211627 |
| C                              | -1.596438 | -5.263259 | -1.504333 | H | -4.772865 | 3.896580  | 0.828616  |
| H                              | -0.945086 | -4.639509 | -3.478725 | C | -4.809888 | 2.817264  | 0.707200  |
| H                              | -2.544667 | -4.049579 | -3.011581 | C | -4.927832 | 0.050354  | 0.390899  |
| H                              | -2.410136 | -5.411665 | 0.505011  | O | -4.976637 | -1.306114 | 0.356353  |
| H                              | -3.415600 | -4.520742 | -0.643741 | H | -2.677294 | 4.420996  | 1.624761  |
| H                              | -2.054463 | -6.202190 | -1.851627 | C | -3.907798 | 1.987254  | 1.379223  |
| H                              | -0.571546 | -5.511020 | -1.179793 | C | -3.915109 | 0.596606  | 1.188063  |
| Ms_bound_N_Prod                |           |           |           | P | -1.117604 | -0.621035 | -0.500422 |
| ZPE -2828.736806               |           |           |           | H | -3.893615 | 4.182963  | 2.922365  |
| Free Gibbs energy -2828.816309 |           |           |           | C | -2.933065 | 3.827691  | 2.516247  |
| Frequency 11.4445              |           |           |           | O | -2.966027 | 2.453592  | 2.237484  |
| N                              | 2.923682  | 1.662527  | 0.913212  | H | -2.151763 | 3.966214  | 3.268991  |
| C                              | 3.089441  | 1.817514  | -0.479515 | C | -2.905378 | -0.255110 | 1.877061  |
| C                              | 3.039540  | 3.130965  | -0.951837 | C | -1.718738 | -0.734973 | 1.276513  |
| C                              | 3.256407  | 0.738473  | -1.386083 | H | -4.077894 | -0.138556 | 3.664789  |
| C                              | 3.124194  | 3.430660  | -2.309302 | C | -3.157119 | -0.526162 | 3.225520  |
| H                              | 2.907655  | 3.939683  | -0.226774 | C | -0.820313 | -1.437176 | 2.093936  |
| C                              | 3.367544  | 1.080352  | -2.748592 | H | 0.123145  | -1.768479 | 1.648923  |
| C                              | 3.258078  | -0.668877 | -0.974577 | C | -2.264640 | -1.251548 | 4.003930  |
| C                              | 3.284219  | 2.384218  | -3.214995 | C | -1.081273 | -1.700730 | 3.433662  |
| H                              | 3.071114  | 4.466186  | -2.643915 | H | -2.488507 | -1.447037 | 5.052794  |
| H                              | 3.498502  | 0.257192  | -3.453368 | H | -0.341814 | -2.240451 | 4.025212  |
| H                              | 3.367442  | 2.584982  | -4.283478 | C | -1.586305 | 1.124379  | -1.009622 |
| H                              | 3.628638  | -1.325717 | -1.767047 | C | -0.742502 | 2.091537  | -0.168836 |
| N                              | 4.008374  | -0.968675 | 0.255181  | C | -1.340242 | 1.389725  | -2.496643 |
| H                              | 3.801905  | -2.644743 | 2.234121  | H | -2.654934 | 1.306005  | -0.811057 |
| C                              | 3.333040  | -1.693190 | 2.474926  | C | -1.018976 | 3.545988  | -0.529992 |
| C                              | 2.693211  | -1.486551 | 3.693311  | H | 0.322420  | 1.867994  | -0.361922 |
| H                              | 2.651065  | -2.282429 | 4.435731  | H | -0.913550 | 1.916526  | 0.904784  |
| C                              | 2.097730  | -0.252058 | 3.935959  | C | -1.613845 | 2.849202  | -2.851811 |
| H                              | 1.569887  | -0.066881 | 4.871786  | H | -0.292934 | 1.131494  | -2.740539 |
| C                              | 2.156006  | 0.751855  | 2.981392  | H | -1.984734 | 0.745965  | -3.112988 |
| H                              | 1.672727  | 1.712898  | 3.171750  | C | -0.767224 | 3.795378  | -2.011207 |
| C                              | 2.816686  | 0.562373  | 1.756036  | H | -0.395438 | 4.213335  | 0.088292  |
| C                              | 3.407376  | -0.694331 | 1.510956  | H | -2.074653 | 3.789273  | -0.301889 |
| H                              | 2.522231  | 2.492734  | 1.332728  | H | -1.430478 | 3.015332  | -3.924256 |
| Pd                             | 1.103718  | -0.940228 | -0.759836 | H | -2.683846 | 3.067676  | -2.674679 |
| S                              | 5.680720  | -0.955582 | 0.204357  | H | -0.980027 | 4.843704  | -2.273389 |

|                     |              |           |           |   |           |           |           |
|---------------------|--------------|-----------|-----------|---|-----------|-----------|-----------|
| H                   | 0.300367     | 3.617463  | -2.227893 | C | -1.574083 | -0.791119 | 2.565785  |
| C                   | -2.319618    | -1.758159 | -1.411505 | O | -1.874078 | -3.053733 | 0.994631  |
| C                   | -1.752402    | -2.073946 | -2.801699 | H | 0.364403  | -4.478288 | 0.415554  |
| C                   | -2.475629    | -3.064009 | -0.624155 | H | 2.632308  | -3.772981 | 1.087058  |
| H                   | -3.308222    | -1.271192 | -1.513960 | H | 3.004655  | -1.659618 | 2.294560  |
| C                   | -2.594086    | -3.101876 | -3.550409 | C | -1.944680 | -1.121197 | 3.873262  |
| H                   | -0.725093    | -2.458164 | -2.670570 | C | -2.972231 | -0.452933 | 4.524139  |
| H                   | -1.648617    | -1.162466 | -3.403455 | C | -3.643098 | 0.578046  | 3.875073  |
| C                   | -3.269343    | -4.126373 | -1.380824 | C | -3.286129 | 0.914948  | 2.576325  |
| H                   | -1.463704    | -3.456509 | -0.412484 | C | -2.267579 | 0.233100  | 1.899071  |
| H                   | -2.948371    | -2.867043 | 0.347442  | H | -1.398877 | -1.914678 | 4.384142  |
| C                   | -2.687181    | -4.399460 | -2.760865 | H | -3.240367 | -0.728607 | 5.542863  |
| H                   | -2.166234    | -3.282893 | -4.548020 | H | -4.440772 | 1.121076  | 4.379608  |
| H                   | -3.612791    | -2.702329 | -3.712299 | H | -3.804504 | 1.735833  | 2.081161  |
| H                   | -3.314591    | -5.051596 | -0.785833 | C | -3.306216 | 0.496057  | -0.873576 |
| H                   | -4.312223    | -3.785653 | -1.507721 | C | 2.266154  | 0.572550  | 3.201174  |
| H                   | -3.291479    | -5.147441 | -3.297296 | C | -1.446524 | 2.496405  | 0.296210  |
| H                   | -1.675599    | -4.825833 | -2.651782 | H | -2.310465 | 2.994901  | 0.774976  |
| NS_bond_cleavage_TS |              |           |           | C | -2.097451 | -4.042391 | 0.015814  |
| ZPE                 | -2555.928594 |           |           | H | -1.817440 | -5.043403 | 0.376162  |
| Free Gibbs energy   | -2556.004425 |           |           | H | -1.542905 | -3.814080 | -0.908392 |
| Frequency           | -223.7548    |           |           | H | -3.170626 | -4.026209 | -0.195826 |
| C                   | 3.650280     | -0.659099 | -0.795212 | H | 2.786025  | 0.678590  | 2.236189  |
| C                   | 2.324457     | -0.489523 | -1.414991 | H | 2.886253  | -0.029716 | 3.882420  |
| C                   | 4.351758     | 0.393526  | -0.201668 | H | 2.112091  | 1.564121  | 3.636865  |
| C                   | 4.236536     | -1.932305 | -0.744890 | C | -1.234138 | 3.100581  | -1.093927 |
| C                   | 5.454435     | -2.143373 | -0.120931 | C | -0.208293 | 2.714594  | 1.171437  |
| C                   | 5.565055     | 0.198032  | 0.446655  | C | 0.167689  | 4.189470  | 1.256985  |
| C                   | 6.116430     | -1.077614 | 0.486420  | H | 0.633721  | 2.153595  | 0.725278  |
| H                   | 3.688987     | -2.751339 | -1.208813 | H | -0.364656 | 2.289316  | 2.174852  |
| H                   | 5.890265     | -3.140478 | -0.101673 | C | -0.875541 | 4.580472  | -0.994227 |
| Br                  | 3.642853     | 2.204984  | -0.215724 | H | -2.131386 | 2.971756  | -1.717943 |
| H                   | 6.073664     | 1.040527  | 0.910165  | H | -0.422883 | 2.555110  | -1.608898 |
| H                   | 7.070818     | -1.233117 | 0.986309  | H | -0.721513 | 4.997938  | -1.999025 |
| N                   | 1.559239     | -1.498103 | -1.668962 | C | 0.362105  | 4.791003  | -0.130002 |
| H                   | 2.041363     | 0.542157  | -1.695120 | H | -1.724350 | 5.130799  | -0.551244 |
| S                   | 0.047633     | -0.740456 | -3.025810 | H | 1.081620  | 4.305030  | 1.859949  |
| O                   | 0.423238     | 0.625773  | -3.445837 | H | -0.628878 | 4.741925  | 1.784968  |
| O                   | -1.371074    | -1.182640 | -3.094653 | H | -2.908341 | 0.718559  | -1.882147 |
| C                   | 0.828036     | -1.835283 | -4.229574 | H | 0.606355  | 5.860490  | -0.057235 |
| H                   | 0.276327     | -1.683605 | -5.163860 | H | 1.222945  | 4.303437  | -0.619939 |
| H                   | 1.880698     | -1.564076 | -4.341375 | C | -4.497824 | 1.415424  | -0.609827 |
| H                   | 0.722830     | -2.865877 | -3.880726 | C | -3.752565 | -0.968469 | -0.891717 |
| Pd                  | -0.027527    | -0.612957 | -0.594860 | C | -5.565754 | 1.208092  | -1.682286 |
| P                   | -1.792400    | 0.678623  | 0.183143  | H | -4.189790 | 2.472367  | -0.577882 |
| C                   | 1.993006     | -1.959999 | 2.030651  | H | -4.933732 | 1.177097  | 0.375099  |
| C                   | 0.895883     | -1.160736 | 2.358518  | C | -4.827625 | -1.184570 | -1.949867 |
| C                   | -0.412413    | -1.539679 | 2.000584  | H | -4.139155 | -1.246201 | 0.105548  |
| C                   | -0.590855    | -2.745739 | 1.297475  | H | -2.889431 | -1.617073 | -1.096163 |
| C                   | 0.502422     | -3.553987 | 0.969457  | H | -6.424551 | 1.868599  | -1.494089 |
| C                   | 1.776350     | -3.151665 | 1.348029  | C | -6.013091 | -0.248902 | -1.737952 |
| O                   | 0.986822     | 0.011914  | 3.030027  | H | -5.151308 | 1.501545  | -2.661858 |



H -5.160139 -2.233514 -1.943151  
H -4.376529 -1.003955 -2.940160  
H -6.764677 -0.388817 -2.528151  
H -6.508760 -0.505687 -0.785451
